# Supplementary material for: Simple, accurate, adjustable-parameter-free prediction of NMR shifts for molecules in solution
Source: Royal Society of Chemistry journal article supplement (doi:10.1039/d3cp00721a), 2023-01-01
Supplement: d3cp00721a1.csv [file d3cp00721a1.csv]

name	molecules number	element	experimental	electrons	relativistic	PBE0 gas/gas	PBE0 gas/solv	PBE0 solv/solv	B3LYP gas/gas	B3LYP gas/solv	B3LYP solv/solv	KT3 gas/gas	KT3 gas/solv	KT3 solv/solv
Bicyclobutane	59	C	-4.3	30	0	188.7748267	189.8557706	190.1284185	183.7059301	185.0885107	185.2201302	190.7347234	191.9019305	192.2674183
Cyclopropane	42	C	-2.9	24	0	188.4050137	189.787478	189.6731669	183.2701006	184.8946554	184.7899209	189.1412952	190.5940945	190.4984437
TMS	104	C	0	49	0	187.3056243	188.4344133	188.2658876	182.245802	183.5140019	183.3546382	188.5514881	190.0380849	189.9169652
Chlorodimethylsilane ((CH3)2SiHCl)	32	C	1.27	50	0	184.8448978	189.2881171	189.723826	179.5470713	184.4132271	184.9003494	185.7805384	190.6022388	191.0492326
Acetonitrile	41	C	1.7	22	0	186.1713883	195.8504064	196.0127464	181.3769769	191.7731004	191.9370319	185.3221627	193.2529206	193.417115
2-Butyne	57	C	3.33	30	0	182.4312594	186.2268648	186.0609651	177.5271748	181.5761387	181.4150572	181.5673783	183.7447198	183.894627
malononitrile	11	C	8.77	34	0	179.0766801	190.2688694	190.3690679	173.7179168	185.8828835	185.9867307	176.1619045	184.1753873	184.3048679
Cyclobutanone	65	C	9.9	38	0	175.5370704	185.5197693	185.7568326	169.1290198	179.9676636	180.2440521	174.1439047	183.8923247	186.7444126
Propionitrile	52	C	10.6	30	0	173.8253836	179.80239	179.9001126	167.8558809	174.4338882	174.5206082	172.0052228	177.0643977	177.1583584
Propionitrile	52	C	10.9	30	0	173.6370992	183.4344803	183.4900884	167.6653013	178.0785268	178.1438013	173.4564715	183.1078286	183.1733882
Nitroethane	31	C	12.4	40	0	174.4272643	183.8883672	184.1794508	168.724211	179.0232431	179.3165476	174.9257305	183.6900497	183.7496904
(E)-3,4-dimethyl-2-pentene	2	C	13.06	56	0	170.1708482	172.1928935	172.0880736	164.8504392	167.2679867	167.1503847	171.1201385	173.4814329	173.3718167
(E)-3,4-dimethyl-2-pentene	2	C	13.21	56	0	167.494243	169.8506424	169.9342793	163.4037671	166.7893099	166.6250738	170.6354243	173.7639068	173.5968618
2-Methyl-2-butene	77	C	13.4	40	0	170.1849915	172.2055263	172.0825077	164.8772749	167.1683588	167.0504453	171.0609761	173.5067858	173.3942197
ethyl cyanoformate	23	C	13.73	52	0	171.6629903	185.6139074	185.8800335	165.9659423	180.7706377	181.0882041	172.6141249	186.8682955	187.1929461
quadricyclane	24	C	14.71	50	0	169.6627725	169.1820913	169.0241586	162.8953881	162.8459405	162.6983202	168.5427668	168.5011637	168.3535293
ethyl sulfide	13	C	14.8	50	0	172.0221262	175.3482192	175.4782062	166.4196957	170.0042196	170.1370866	172.3860617	175.4479436	175.6310741
2-methylthiophene	10	C	14.95	52	0	168.8365663	174.7046138	174.67441	163.3962347	169.7336083	169.7090419	169.1812431	174.9229179	174.9101612
methylenecyclobutane	7	C	16.76	38	0	167.6536297	171.6476113	171.4821443	161.4750603	165.8889712	165.8385295	165.9962429	170.683233	170.5413273
Methylthiazole	72	C	16.77	52	0	166.4839126	169.3629603	169.4313917	161.2057407	164.4768227	164.5383582	167.9449285	171.5370551	171.6158914
2-Methyl-2-butene	77	C	17.3	40	0	167.5885217	171.0091205	170.8993111	162.4073265	166.293599	166.1948508	169.3540613	173.1791298	173.083492
isoprene	21	C	17.85	38	0	166.0371187	168.8021569	168.8002367	160.6984966	163.8655219	163.8652313	167.8475896	170.8370698	170.843377
1-Chloro-2-methyl-1-propene	62	C	18.16	48	0	166.8573414	172.1193568	172.1255174	161.5298539	167.4651885	167.5192204	168.5014085	174.1747755	174.1156079
crotonaldehyde (trans-2-butenal) s-trans	1	C	18.61	38	0	164.3062765	176.4169674	176.4570063	158.9768988	171.8133852	171.9012901	165.1937485	177.4854622	177.5747795
Chloroethane	29	C	18.7	34	0	165.3923808	170.9972785	171.1830668	159.5976448	165.7627316	165.9916473	166.0199546	171.6981117	171.8629474
dimethylacetal	9	C	18.8	50	0	167.0078747	168.2181886	168.1956409	161.1063938	162.4263458	162.3394155	168.6892813	169.8432375	169.7483941
2-Methyl-2-cyanopropane	67	C	19.87	38	0	163.5922155	165.9371581	165.967889	156.4759462	159.2863564	159.3026152	161.0818723	162.7659954	162.8084271
2-Methyl-2-cyanopropane	67	C	19.98	38	0	164.0933514	171.643081	171.6627002	158.2486082	166.3386082	166.3754756	165.0235179	172.528445	172.5195778
Methyl acetate Z	48	C	20.4	40	0	164.7879825	170.1667115	170.2561953	159.2083301	164.9406352	165.0274034	167.02802	172.700506	172.4681586
beta-butyrolactone	15	C	20.58	46	0	163.9531137	172.6497092	173.13219	158.4725248	167.9436941	168.5183989	165.4236777	174.4893434	174.9348918
N,N-Dimethylacetamide ((Me)2NCOCH3))	64	C	21.4	48	0	163.1975435	165.2157546	165.0379386	157.5243176	159.8294093	159.6893657	165.7001907	167.8498953	167.682948
Toluene	99	C	21.4	50	0	162.3377818	166.1292292	166.0836694	157.1554536	161.2934366	161.2565985	163.6991112	168.5313359	168.5005924
1,1,1-Trichloroacetone	50	C	21.51	80	0	162.6875562	167.3504596	167.6888432	157.0968978	162.6377355	162.8757549	164.8182102	169.6623656	170.0625658
(E)-3,4-dimethyl-2-pentene	2	C	21.52	56	0	163.305933	164.5833577	164.4612951	156.9507766	158.5362597	158.4651463	164.4390888	166.1107075	166.0430034
2-methylpyrazine	6	C	21.53	50	0	162.5760161	168.7192684	168.8203932	157.2602717	163.9400641	164.0513901	164.2540876	171.1470928	171.2770446
gamma-Butyrolactone (C4H6O2)	66	C	22.2	46	0	160.2382076	171.6258565	172.0842261	153.8902834	166.3616743	166.9119007	159.9634842	171.7462502	172.2380442
Cyclobutane	56	C	22.4	32	0	161.0870194	162.7052344	162.5978395	154.761448	156.6856636	156.5903309	159.1279277	160.9878107	160.9501595
1-Chloro-2-methyl-1-propene	62	C	22.85	48	0	160.4957889	169.6318333	169.6382969	155.0696172	165.0739645	165.1246695	162.2256429	171.8897742	172.044357
Oxetane	47	C	22.9	32	0	163.8425278	169.6849948	169.9197343	156.8325791	163.3137952	163.5867194	162.6257335	169.3947749	169.6337011
Cyclohexene	90	C	22.9	46	0	160.2102647	162.0651704	162.0460608	153.4173298	155.4715494	155.4520408	159.7901044	161.3674737	161.3583001
Cyclohexenone	94	C	22.9	52	0	159.5969147	165.5805054	165.9141825	152.7172459	159.1924924	159.5733118	158.4602239	164.5643988	164.9223577
Cyclopentene	78	C	22.98	38	0	159.7748701	161.8952781	161.7834606	153.6675264	156.1047631	156.0658202	159.8042743	161.9828901	161.9579207
quadricyclane	24	C	22.99	50	0	160.0389003	160.913009	160.8235677	153.4593649	154.6092845	154.5141825	160.5604253	161.5620127	161.4724469
2-Chloropropanitrile	53	C	23.4	46	0	160.7134505	170.3793181	170.8800266	154.6269034	164.9945251	165.5704794	161.0446634	170.6391777	171.1330977
Cyclopentanone	82	C	23.4	46	0	159.0837974	166.6027937	166.6327198	152.6124778	160.7847413	160.8494603	159.0958732	167.2913728	167.3694457
pivalaldehyde	20	C	23.44	48	0	161.4679337	166.0481985	165.9412702	155.9033478	160.933399	160.8439623	163.699027	169.3846993	169.3064362
Isobutylene	55	C	23.45	32	0	159.2797994	162.8497185	162.7671958	153.95756	157.9275649	157.8587854	161.3316969	165.0029912	164.9246874
N-Methylpiperidine	92	C	23.85	56	0	158.6926728	160.6793528	160.6650286	152.186805	154.463721	154.4556322	158.7759472	161.2331445	161.2567469
Tetrahydropyran (THP)	80	C	24	48	0	158.7507977	162.6749336	162.6775954	152.3277983	156.7303525	156.7544142	158.8259824	163.5427173	163.5854916
N-Methylpyrrolidine	81	C	24.6	48	0	159.3127669	161.3450212	161.3189437	152.6606084	155.110835	155.0890494	159.2673984	161.5783462	161.5602731
Cyclohexanone	93	C	25.1	54	0	156.8319727	163.4733235	163.568942	150.2652292	157.4633467	157.5972254	156.6620956	163.2815866	163.4293479
Cyclohexene	90	C	25.4	46	0	157.0450668	159.0536073	158.9830087	150.59659	152.9075512	152.8384013	156.6565485	158.7136206	158.6499445
2-Methyl-2-butene	77	C	25.6	40	0	157.0500711	159.5026186	159.4227527	151.6497885	154.4130103	154.3417889	159.1179953	161.8383711	161.7699209
Cyclohexenone	94	C	25.8	52	0	156.2476052	166.3023165	166.5121297	149.8899532	160.7060318	160.9825406	156.0591078	165.7888172	165.9869723
THF	63	C	26	40	0	155.861126	160.4251356	160.3344687	149.2427928	154.357576	154.2951569	155.8406535	160.9277303	160.8534332
N-Methylpiperidine	92	C	26.01	56	0	156.5855299	158.0628477	158.1575295	149.7537973	151.4986914	151.5840159	156.2961305	158.0551275	158.1649047
2-Chloropropene	44	C	26.05	40	0	157.4307212	162.9195729	163.1748995	151.9809145	157.9916321	158.2569019	158.6492994	164.4148926	164.6702453
Cyclopentane	76	C	26.5	40	0	156.8263267	158.4154033	158.2963035	150.1510474	152.0563676	151.9453084	156.9684117	158.8531761	158.7470919
1,3-dioxane	8	C	26.64	48	0	156.3332909	160.8376031	160.9100986	149.4897478	154.4623244	154.5669878	155.9496647	160.4793667	160.5687777
MTBE (methyl t-butyl ether)	79	C	27.06	50	0	157.8260166	159.3565389	159.3350833	152.3443218	154.0923616	154.0809429	160.6832756	162.5800635	162.5588056
Tetrahydropyran (THP)	80	C	27.1	48	0	156.0332476	159.0072548	158.980712	149.3059357	152.6325444	152.6119985	155.9306179	159.411154	159.4003025
Cyclohexanone	93	C	27.2	54	0	154.6631443	160.3026772	160.2838244	147.835916	154.0109863	153.9945642	153.0051288	158.237446	158.150512
t-Butylacetylene	89	C	27.25	46	0	156.4299181	155.8940243	155.626883	148.1712938	147.6682092	147.3947509	153.6546487	152.6891357	152.3923209
Cyclohexane, chair	88	C	27.3	48	0	155.6141588	156.9982935	156.87284	149.0621063	150.7044322	150.5776354	155.6817374	157.6307869	157.5210621
2-Chloropropane	43	C	27.4	42	0	157.080912	161.5351095	161.6955161	151.4825588	156.4102577	156.6276171	158.6801091	163.1939667	163.363578
gamma-Butyrolactone (C4H6O2)	66	C	27.7	46	0	156.2109608	161.6514204	161.5950527	149.9387489	155.992635	155.8706866	157.5717513	162.900941	162.7655017
2-Methyl-2-nitropropane	61	C	27.8	56	0	156.1823031	162.4830488	162.526266	150.6312797	157.5490762	157.6274632	158.2814832	165.7587358	165.8321949
2-Methyl-2-cyanopropane	83	C	28.12	46	0	156.3150406	153.9684042	153.9154767	148.0709747	146.0052123	145.9572081	153.4495165	150.2112483	150.2262314
2-Methyl-2-cyanopropane	83	C	28.41	46	0	155.3113885	161.8332425	161.8408007	149.5892306	156.6265274	156.6234224	157.3108318	163.8256935	163.8189812
Cyclopentenone	84	C	29.03	44	0	153.4138795	164.5531425	164.6451981	147.1065508	159.1075525	159.2579303	153.5186409	164.0798281	164.1635094
3,3-Dimethyl-1-butene	87	C	29.4	48	0	155.1497904	157.2732956	157.1491388	149.6232098	151.9977724	151.8850607	157.8470753	160.582672	160.4583026
Cyclobutene	58	C	30.2	30	0	152.4297934	154.1363325	154.0173262	145.7839706	147.766463	147.6565896	150.907549	152.7434675	152.6402097
methyl isothiocyanate	0	C	30.48	38	0	158.5897755	179.6074317	179.9472196	151.1663769	168.9733054	175.4875536	153.1652505	164.9116009	167.3221971
Acetone	46	C	30.6	32	0	154.7384763	159.2499996	159.5365963	149.4177234	154.4413481	154.7777154	157.6194259	163.4846047	163.8092063
Acetaldehyde	36	C	30.7	24	0	152.1490919	157.655859	158.0080923	146.5667869	152.6021132	153.0211024	154.6883354	159.8371873	160.1687439
tert-butyl isocyanide	22	C	30.8	46	0	152.8447423	158.6237956	158.7135262	147.1897204	153.4886165	153.5977444	155.1997775	161.2804654	161.3656164
t-Butylacetylene	89	C	30.92	46	0	152.8256985	155.7796219	155.6734951	147.0994609	150.3045771	150.2126085	155.0997338	158.4638855	158.3834809
N,N-Dimethylformamide	49	C	31.1	40	0	155.6983316	159.9781816	159.8745154	149.7805032	154.5678202	154.4885904	156.6457122	161.3789564	161.3240052
quadricyclane	24	C	31.98	50	0	149.9697095	150.8777395	150.7930926	143.4523898	144.6709412	144.6053781	151.9276619	152.9473973	152.8858982
Bicyclobutane	59	C	32	30	0	154.8083801	155.3694598	154.9812088	148.8548902	149.5901436	149.303173	154.2194623	154.8503384	154.3349162
methylenecyclobutane	7	C	32.08	38	0	151.5504871	153.8254622	153.662589	145.3232207	147.9899656	147.9160346	150.2144087	152.6833621	152.5426477
3-Butyn-2-one	69	C	32.2	36	0	150.8215279	154.5666852	155.0980087	145.2612631	149.4036356	149.9885971	153.344804	156.8983998	157.375772
Cyclopentene	78	C	32.59	38	0	149.2464443	151.148953	151.0631418	142.6839041	144.8988179	144.8140312	149.7464023	151.8120043	151.7300963
Acetyl chloride	40	C	33.7	40	0	151.8226714	157.7054329	158.6005548	146.3477083	153.0544871	154.0845067	153.6196468	159.1689214	160.0296976
3,3-Dimethyl-1-butene	87	C	33.7	48	0	148.7798214	148.4252758	148.2304672	140.1842634	139.9319364	139.7591848	147.0575361	146.5537597	146.3706584
Cyclopentenone	84	C	34.02	44	0	150.0401994	153.4843579	153.5334825	143.6416264	147.5553699	147.6395919	152.1137472	156.6865425	156.7488533
t-Butyl chloride	60	C	34.5	50	0	149.5992053	153.5125815	153.6412331	144.1036417	148.4471105	148.6037992	152.1009806	156.2147025	156.3558456
N,N-Dimethylacetamide ((Me)2NCOCH3))	64	C	34.8	48	0	152.7359239	155.4736551	155.2966733	146.6641866	149.8721941	149.734067	153.7169549	156.7204177	156.5456719
N-Methylpyrrole	85	C	35.6	44	0	148.5124045	157.9677135	157.632341	142.8416957	152.8750319	152.5266265	149.1517831	158.430681	158.076729
N,N-Dimethylformamide	49	C	36.1	40	0	148.7542745	160.9441111	160.2815691	142.988272	156.023883	155.3148917	150.3474943	162.5942093	161.9910337
(E)-3,4-dimethyl-2-pentene	2	C	36.99	56	0	145.0440176	146.0135011	146.0010222	138.9452116	140.2034844	140.0699706	146.027169	147.0959248	146.9557036
N,N-Dimethylacetamide ((Me)2NCOCH3))	64	C	37.9	48	0	147.6029193	158.277889	157.9471475	141.6936496	153.1333447	152.8342885	148.497005	159.3021218	159.0275066
Cyclopentanone	82	C	38.2	46	0	144.2952075	147.4783735	147.3569357	138.1128288	141.7679103	141.6927563	146.575409	150.2507216	150.140818
Cyclohexenone	94	C	38.2	52	0	144.6139654	146.4150711	146.6342065	137.9652317	140.0333975	140.3079045	145.8770278	148.3018715	148.514836
Oxirane	37	C	39.5	24	0	144.2314198	146.9927498	146.1083757	137.1420043	140.1806432	139.1803543	144.0813743	146.827604	146.000148
N,N-Dimethylaniline	102	C	40.2	66	0	143.4005832	148.4262012	148.0676688	137.5692603	142.7695071	142.4876002	145.1769127	149.7651993	149.7053792
dimethylcyanamide	16	C	40.53	38	0	143.8723217	153.3483642	154.0402302	137.5042976	147.6878306	148.3907464	143.4411859	152.062326	152.3691382
Cyclohexanone	93	C	41.9	54	0	140.3931143	142.4289411	142.6070325	133.8046073	136.2110378	136.4288181	141.6684649	144.0662372	144.2506336
diketene	19	C	42.4	44	0	142.07566	147.8863914	148.9912104	135.3240064	141.9608027	143.1815271	142.304296	148.3968354	149.1711113
pivalaldehyde	20	C	42.5	48	0	140.000051	138.2730937	138.2144631	131.3340012	129.8003493	129.7745286	139.4815381	137.2383174	137.2184906
N-Methylpyrrolidine	81	C	42.9	48	0	142.4195	144.2335966	143.5867326	136.7905983	138.8051247	138.1375785	143.6696523	145.8428291	145.2657881
beta-butyrolactone	15	C	44.36	46	0	139.7372865	145.2731507	146.713216	132.847892	139.1180893	140.8202532	140.5914984	146.2481236	147.7341299
Allyl chloride	45	C	45.1	40	0	133.7430614	137.1356066	135.8776456	124.3281372	127.5534377	125.8990192	133.7649485	136.9555703	135.6215022
1,1,1-Trichloroethane	30	C	45.4	66	0	138.3538961	142.5012474	143.1271304	132.3251911	136.8471126	137.4806424	138.6653799	142.0486646	142.6249771
N-Methylpiperidine	92	C	46.85	56	0	136.49238	138.4703603	138.0111572	130.7864672	132.9990539	132.5372255	138.0830806	140.5614494	140.1337805
allyl isothiocyanate	17	C	47.12	52	0	135.54355	148.4841306	153.5174006	128.3541301	141.6821956	147.4879834	132.6863697	142.2987479	141.5045242
Cyclobutanone	65	C	47.8	38	0	136.1060995	140.8192133	141.6671586	129.2412209	134.5372653	135.5062934	135.778874	139.8655232	141.2273609
MTBE (methyl t-butyl ether)	79	C	49.41	50	0	134.7294327	136.1723937	135.8115648	128.131861	129.6974344	129.2842765	135.4348707	136.5260691	136.1582116
Methanol	27	C	49.8	18	0	131.9328248	134.0013942	133.720003	125.096283	127.3616548	127.0633348	132.3827815	134.4961017	134.2640798
Norbornadiene	100	C	50.3	50	0	130.2109354	131.9546182	131.9082829	122.5242573	124.6515799	124.6072242	130.934966	132.7219208	132.6771918
Methyl acetate Z	48	C	51.4	40	0	132.1757382	134.8744781	134.4782445	125.3722628	128.3679928	127.8599933	132.944456	135.8258735	135.1753646
dimethylacetal	9	C	52.31	50	0	128.5377751	131.0121172	130.2173774	121.9129677	124.5768216	123.7013977	129.2573607	131.698722	130.9673906
tert-butyl isocyanide	22	C	54.14	46	0	132.0757508	131.4209605	130.5574724	122.8404387	122.5360644	121.5417265	129.1995253	127.0732305	126.2051046
Anisole (methoxybenzene)	101	C	54.8	58	0	129.8201222	131.9936508	131.3625869	123.2652073	125.6646288	124.956261	130.7273168	133.4722105	132.7998814
N-Methylpiperidine	92	C	56.59	56	0	126.3510075	127.4787792	126.8917074	119.5568523	120.9187733	120.307676	126.9362518	128.447272	127.9163758
N-Methylpyrrolidine	81	C	56.9	48	0	125.4963993	126.9427047	126.4103024	118.8662318	120.5974828	120.0377682	126.6309011	128.3813144	127.9092756
Nitromethane	28	C	63	32	0	123.0553395	126.3222129	127.2187028	115.7402182	119.3872784	120.310392	125.3020093	128.4797539	129.2504924
ethylene carbonate	12	C	65.05	46	0	118.9895589	128.4059849	127.7372881	111.4270922	121.6781485	120.8704083	119.0340307	126.3073328	125.5057361
ethyl cyanoformate	23	C	65.4	52	0	118.3184227	121.0563716	119.9272006	109.8585641	113.0212079	111.7213553	117.4737343	119.1108875	117.6947992
t-Butylacetylene	89	C	66.52	46	0	111.632613	114.1551661	113.9539846	109.3972546	111.4649673	111.2642904	123.4775414	128.3218514	128.1833194
1,3-dioxane	8	C	66.94	48	0	115.0280713	118.1357895	117.4146981	107.6256537	111.0473995	110.2235183	115.1496723	118.1587927	117.4531066
THF	63	C	68	40	0	113.2706598	114.8185011	114.3746032	105.4689408	107.2003588	106.6823481	113.6149882	115.3478728	114.9388744
beta-butyrolactone	15	C	68.12	46	0	116.6210969	119.3395984	117.8083647	107.5664743	110.5118282	108.5758002	115.8602395	117.8347348	116.1901749
gamma-Butyrolactone (C4H6O2)	66	C	68.6	46	0	115.5726179	122.1070337	120.747267	107.5705961	114.5732138	112.8606916	115.4886059	121.5077327	120.1176995
Tetrahydropyran (THP)	80	C	68.8	48	0	113.2624779	114.5582403	114.002788	105.7297238	107.1786655	106.5635018	113.5031275	115.1075408	114.5712668
Nitroethane	31	C	70.9	40	0	114.9744163	117.1591891	117.5759234	106.2086098	108.6313454	108.9893913	115.8663338	117.2480604	117.4976295
2,3-Dichloro-2,3-dehydrobutyrolactone	71	C	70.9	76	0	111.5828545	120.5635368	120.1926385	104.0931531	113.7386284	113.2966161	112.6934295	121.3129198	121.4451852
Oxetane	47	C	72.6	32	0	110.5744914	112.2817486	111.8675619	102.5308617	104.3984864	103.9101217	109.8010151	111.9346672	111.6105299
MTBE (methyl t-butyl ether)	79	C	72.8	50	0	110.7570507	110.3653399	109.6684536	100.7935001	100.3258212	99.51758228	108.6410541	107.5802597	106.905616
2-Butyne	57	C	74.56	30	0	103.8050607	104.9033662	104.6301421	100.3162673	101.1220959	100.8452842	113.4154113	115.325802	115.0420526
Norbornadiene	100	C	75.2	50	0	101.5452862	102.4033129	102.2953978	94.7772722	95.89274888	95.78876016	103.7789875	104.3957874	104.3140704
2,5-dihydrofuran	4	C	75.42	38	0	104.3516044	106.1937896	105.865912	96.81324403	98.8280598	98.44178721	105.3741597	107.9529479	107.6557653
3-Butyn-2-one	69	C	78.8	36	0	101.0657128	97.28961517	96.98626838	98.26281285	94.14800456	93.8084015	111.0331206	106.6717724	106.3178852
3-Butyn-2-one	69	C	81.9	36	0	99.09241705	98.23125583	98.23121988	94.79784846	93.76842166	93.74816724	107.0281472	106.1655797	106.1702618
2-Methyl-2-nitropropane	61	C	85.2	56	0	98.89273208	94.13071654	93.91212365	86.50813335	81.49800426	81.07655891	97.31545795	89.77658175	89.47622278
diketene	19	C	87.06	44	0	94.03273164	95.7267465	95.15017461	89.41891963	91.57949763	91.00225664	104.01728	105.5305965	104.7250338
t-Butylacetylene	89	C	92.97	46	0	86.63033422	87.51643659	87.30446085	82.31056502	83.12656412	82.90284348	97.31021566	97.14724411	96.93559945
1,3-dioxane	8	C	94.28	48	0	85.96359498	86.60703924	85.73066132	78.05353624	78.71519965	77.741958	86.31175635	86.25180395	85.40961084
dimethylacetal	9	C	101.24	50	0	74.70394561	75.68358007	74.70240445	65.76529008	66.7417691	65.64347418	74.62575763	75.48627036	74.59394645
Indole	103	C	101.9	62	0	75.55346088	75.09293033	74.84305591	69.47595972	69.08336892	68.84537411	86.29434102	84.75061012	84.56701201
Isoxazole	54	C	103.61	36	0	76.31127463	77.99354219	77.93633865	70.87207591	72.90831139	72.96805377	87.42791552	88.84910923	88.82057488
methylenecyclobutane	7	C	104.79	38	0	72.41084656	71.40705124	71.26766909	67.64650615	66.79470952	66.54081984	83.18131424	82.12192272	82.02632277
N-Methylpyrrole	85	C	108.3	44	0	68.51231694	65.23480399	64.73053799	62.34584372	58.94830498	58.44304441	79.94433874	75.76323834	75.37907644
3,3-Dimethyl-1-butene	87	C	109	48	0	68.24348832	67.42891162	67.19880881	64.01064988	63.33203603	63.10712813	80.06466857	79.07692612	78.83635356
malononitrile	11	C	109.35	34	0	68.74048149	63.5333566	63.43655797	65.29031381	60.17074282	60.07947649	81.25553611	75.74905054	75.67691784
ethyl cyanoformate	23	C	109.62	52	0	67.69281505	67.11714935	66.93339301	64.34949111	63.67358398	63.46027412	79.2383874	77.2182824	76.96704606
Furan	68	C	109.7	36	0	68.44007933	68.48482043	68.1898353	62.34868807	62.51643557	62.29215926	80.11626938	80.08281837	79.84672015
Isobutylene	55	C	110.57	32	0	65.9522615	65.65724294	65.38838144	62.00432856	61.77117446	61.51295618	77.78674007	76.94102854	76.69218865
Indole	103	C	111.1	62	0	68.89100935	68.61246249	68.26052446	63.21505636	63.2257833	62.9014063	80.29644579	79.53071831	79.25342777
2-Chloropropene	44	C	112.63	40	0	65.04026586	64.15722395	64.15661376	60.96954748	60.30972483	60.33819013	77.06338314	76.17097306	76.22978977
N,N-Dimethylaniline	102	C	112.7	66	0	68.50125885	67.43162924	66.88105723	62.08214648	60.93770912	60.47632767	78.10116624	73.89187278	73.6075703
Furfural	86	C	112.9	50	0	65.18011149	68.79113839	68.38640234	58.972428	63.08619081	62.72582848	76.2813138	79.47571905	79.10534201
Methylthiazole	72	C	113.11	52	0	65.19328163	65.48467593	65.25424084	57.13398603	57.65877795	57.46679397	76.36020058	75.39818474	75.13861639
isoprene	21	C	113.64	38	0	58.02484045	56.65997116	56.34682543	53.88548195	52.70412369	52.4066203	70.80941927	69.09707629	68.82092148
Anisole (methoxybenzene)	101	C	114.1	58	0	65.44489623	64.04680989	63.81932455	59.38175004	58.08827927	57.86046215	76.8581474	74.47496272	74.27013772
fumaronitrile	14	C	114.26	40	0	62.73898052	59.63653161	59.48394068	58.6973616	55.6252291	55.46983008	70.75814977	65.97185308	65.90596833
1,1--Dichloroethylene	33	C	115.5	48	0	62.21010905	59.19772255	59.44526567	57.80803741	54.92409702	55.14876573	74.28180023	71.71134628	71.93447716
Fluorobenzene	95	C	115.5	50	0	62.36372587	63.35616658	63.21376272	56.39244681	57.59306329	57.46257006	73.95922834	73.87951508	73.75056546
(E)-3,4-dimethyl-2-pentene	2	C	115.93	56	0	58.9924625	57.76909724	57.53324472	53.58539276	52.5339612	52.31281926	69.45957461	68.4712749	68.28249768
N,N-Dimethylaniline	102	C	116.6	66	0	62.82212255	58.20167238	57.81651782	56.58069973	51.9982452	51.65213286	73.52934698	64.11859589	63.78802197
isoprene	21	C	116.75	38	0	63.37087788	61.64149973	61.43896828	59.31578996	57.77232888	57.5707332	76.53521663	74.63395205	74.4682698
Acetonitrile	41	C	117.4	22	0	62.36499509	55.87490201	55.49190272	59.15094675	52.46577473	52.08500589	74.46957148	67.98638136	67.65171941
allyl isothiocyanate	17	C	117.49	52	0	57.27900239	57.81567288	56.93700482	53.15204336	54.17750078	53.28140317	70.45142534	69.8784538	69.1431234
2-Chloropropanitrile	53	C	117.9	46	0	59.2181945	55.45414534	55.34822185	55.54576205	51.70409761	51.59847791	70.08849586	65.67236155	65.54037729
Allyl chloride	45	C	118.3	40	0	58.37278903	57.37695878	56.39283584	53.4568948	52.67131901	51.78398619	70.65541646	69.27373806	68.3670813
2-Methyl-2-butene	77	C	118.8	40	0	55.24404407	54.20307869	53.94425648	49.60044462	48.64677909	48.39359715	65.67852999	64.40304013	64.17280267
fumaronitrile	14	C	119.33	40	0	55.87928799	53.76154481	54.16100144	50.99441907	49.0833827	49.5762284	68.99446758	65.01832745	65.33027964
dimethylcyanamide	16	C	119.36	38	0	60.49053633	58.00593991	58.09778396	56.02441106	53.19419079	53.25643323	70.19136335	66.01907408	66.01667042
Indole	103	C	119.7	62	0	57.78983812	54.53005193	54.1281223	51.65351149	48.47807366	48.08357794	69.59420574	64.54479506	64.22429212
Indole	103	C	120.6	62	0	56.35882225	52.16698971	51.87177701	50.61950809	46.56895876	46.27910978	68.87717858	64.4378661	64.2102615
Anisole (methoxybenzene)	101	C	120.7	58	0	58.14873814	56.90006189	56.6507682	51.96886002	50.93836164	50.68510004	69.91564157	67.04550274	66.83105745
Propionitrile	52	C	121	30	0	57.49226346	51.91215366	51.55753588	54.05381565	48.2450507	47.88816817	69.30699709	63.34737689	63.0303944
2,3-Dichloro-2,3-dehydrobutyrolactone	71	C	121.2	76	0	49.62632955	53.43768503	53.12777801	41.12369036	45.15224739	44.86894503	60.31392412	62.85157414	62.03828039
N-Methylpyrrole	85	C	121.6	44	0	57.85309823	55.88573236	55.82777101	51.18945125	49.22114432	49.20223648	68.93650445	66.24401119	66.24097516
Indole	103	C	121.7	62	0	55.86759056	56.18778851	56.09701042	49.62073552	50.27688955	50.22365167	68.31624249	67.26589601	67.23009652
Furfural	86	C	121.9	50	0	62.26285143	61.19285806	60.4483597	56.14131703	55.14242006	54.36322834	74.66073699	72.75232612	72.18914142
Pyrimidine	73	C	122.6	42	0	56.84843607	56.25777043	56.18624261	50.91088518	50.45231533	50.36666912	68.86078669	66.65211515	66.54177969
Nitrobenzene	97	C	123.5	64	0	52.08995483	54.57356767	54.20363768	46.17303123	48.98499216	48.58286181	65.19540373	64.00803164	63.54455316
pyridine	5	C	123.55	42	0	54.5117578	54.43326101	54.34626243	48.48351138	48.53730911	48.4354096	66.65434168	65.46481777	65.35882386
2-Methyl-2-cyanopropane	67	C	123.83	38	0	54.15184005	49.15694567	48.81405946	50.56939177	45.30183504	44.95282536	65.97363039	60.56187797	60.24636203
Fluorobenzene	95	C	124.2	50	0	54.42460162	56.40793369	56.2049032	48.07560991	50.56913868	50.36598095	66.6014986	67.94417634	67.80663458
Indole	103	C	124.3	62	0	55.42726631	53.38492351	53.18245229	49.34291684	47.40598827	47.18750771	68.13516214	64.99965015	64.82738798
2-methylthiophene	10	C	125.14	52	0	52.29323369	51.8931966	51.70866127	46.70136384	46.47178648	46.2982744	64.15307204	63.87955775	63.7546086
2-Methyl-2-cyanopropane	83	C	125.9	46	0	51.86710841	46.98081525	46.62476993	48.13529169	42.9727667	42.60956264	63.92818263	59.20570372	58.87482068
2,5-dihydrofuran	4	C	126.34	38	0	48.06157375	49.20781439	49.26399996	42.4764293	43.89821994	43.96452968	60.19421435	60.22515549	60.2846809
Chlorobenzene	96	C	126.4	58	0	51.59440778	54.81209898	54.64885919	45.43666843	49.19499872	49.07076037	64.56692066	66.80465738	66.69814393
Toluene	99	C	126.6	50	0	51.82622329	51.10310234	50.82316102	45.83781308	45.31259785	45.03457567	64.27151957	62.57513393	62.32432368
Thiophene	70	C	126.7	44	0	51.1331744	51.17809837	50.98029508	45.32635194	45.51770156	45.33650605	63.70514584	63.86925807	63.6715276
2-methylthiophene	10	C	126.86	52	0	51.75460355	51.05086692	50.83474232	46.01592338	45.44233095	45.22787105	64.37970792	63.81714281	63.64796059
Cyclohexene	90	C	127.3	46	0	46.61588594	45.09778184	44.78769212	40.76018207	39.29392381	38.98714687	57.8222677	56.02100968	55.74219599
Indole	103	C	127.6	62	0	48.67135726	46.80327392	46.40726235	41.05432439	39.19927394	38.82268274	60.83609168	56.6760627	56.34298158
1,2-Pyrazine	75	C	127.7	42	0	54.3954267	53.07503306	53.03291975	48.64137121	47.55821449	47.61090006	67.36093697	64.18668775	63.70579807
Benzene	91	C	128.5	42	0	48.4579723	48.45368427	48.17517516	42.45083456	42.62953662	42.35511651	61.29314276	61.33716381	61.0986363
Chlorobenzene	96	C	128.6	58	0	47.70200503	48.78529553	48.73425588	41.74928636	43.16193026	43.15678474	59.88263493	60.69361002	60.68028061
N,N-Dimethylaniline	102	C	129	66	0	47.53896626	43.12398251	42.82959015	41.59835503	37.482635	37.16523371	61.20624358	53.51268867	53.11086565
Toluene	99	C	129.2	50	0	48.45131372	47.94528595	47.65023644	42.4911789	42.14614077	41.85608157	61.39622745	59.87845755	59.6179943
Nitrobenzene	97	C	129.5	64	0	48.41066983	55.54567763	55.2976582	42.44644892	50.25133288	50.02305264	61.0393764	63.03595963	62.75546321
Anisole (methoxybenzene)	101	C	129.5	58	0	47.28986196	46.56224394	46.19214121	41.35338837	40.83403692	40.466876	60.49689697	58.03529508	57.69747018
Chlorobenzene	96	C	129.7	58	0	47.45580146	49.82542779	49.46541088	41.4510749	44.17867703	43.86792642	60.14917452	61.50182196	61.19071415
Cyclohexenone	94	C	129.8	52	0	45.10439241	46.67359876	46.91635827	39.05709132	40.73311497	41.04043968	56.65994716	53.58747934	53.81249938
Toluene	99	C	130	50	0	47.77962107	47.11561084	46.86679085	41.87468739	41.42292272	41.18110707	60.38139742	59.27146533	59.05263027
Fluorobenzene	95	C	130.2	50	0	46.68424391	48.40055267	48.10017804	40.80070187	42.89249184	42.56622904	59.59557209	60.4778699	60.18066815
allyl isothiocyanate	17	C	130.4	52	0	39.32847801	39.20843716	41.7837937	33.01770189	33.07696861	35.80769521	50.1904251	48.75611573	49.74368868
Cyclopentene	78	C	130.77	38	0	42.69961489	41.73743375	41.46094106	37.32939381	36.44658071	36.16943038	55.20731003	54.03622943	53.79111813
2-Methyl-2-butene	77	C	132	40	0	42.02195422	40.15624926	39.6987881	34.89349836	33.00998235	32.55731697	52.28406764	50.96304483	50.55867155
Allyl chloride	45	C	134.3	40	0	37.09461367	37.36929587	37.39615109	31.02396239	31.63260592	31.66832262	48.94407213	48.75133435	48.78920442
Cyclopentenone	84	C	134.37	44	0	39.49648616	42.04709967	42.06557858	33.87949739	36.58732746	36.63412493	51.85726405	51.95415678	51.9950805
Chlorobenzene	96	C	134.4	58	0	36.05011995	37.01922175	36.74784003	26.68696838	27.66882118	27.26738271	47.00136417	46.98640762	46.61343194
crotonaldehyde (trans-2-butenal) s-trans	1	C	134.61	38	0	40.44579412	41.65409686	41.92669277	34.39234441	35.70744876	36.05495398	51.98666477	49.9667386	50.31594297
Nitrobenzene	97	C	134.8	64	0	42.05470008	50.38845861	50.13585159	35.91784182	45.16687262	44.90208701	56.07846583	58.81275562	58.46255227
1-Chloro-2-methyl-1-propene	62	C	134.91	48	0	38.72509701	34.44867395	34.15720303	31.70173249	27.52142707	27.24348279	50.17028571	46.50603076	46.41197518
Indole	103	C	135.6	62	0	42.23967609	42.50267053	42.32228409	34.21658422	34.4761589	34.3337872	53.86881041	51.16794622	51.01109433
pyridine	5	C	135.89	42	0	41.83871451	42.88163873	42.8402318	36.10140786	37.42930626	37.38920811	55.88536055	56.0116147	55.99718773
1,4-Benzoquinone	98	C	136.6	56	0	40.80636404	43.05746548	43.19829664	34.87284053	37.45999483	37.66095604	54.70480082	46.08348042	46.22448019
maleic anhydride	3	C	136.76	50	0	39.30135223	43.04128803	43.21312617	33.95855959	38.30101989	38.54146751	53.33765441	51.84877283	51.95664124
Cyclobutene	58	C	137.2	30	0	36.59886513	35.69013935	35.36706073	30.88261221	30.07372217	29.75537682	48.3034024	47.48137839	47.19651409
Toluene	99	C	137.7	50	0	37.75328274	35.80209855	35.40534543	30.49971877	28.68197739	28.28908657	50.02719135	48.67013814	48.30914334
isoprene	21	C	139.82	38	0	33.60222648	32.93190549	32.50161527	27.45270371	26.73896744	26.30776899	46.69635573	45.74540394	45.31950401
Isobutylene	55	C	141.35	32	0	29.14864103	25.50859801	24.9108911	21.76923052	18.11952246	17.5312736	40.87811095	38.44752414	37.86057366
(E)-3,4-dimethyl-2-pentene	2	C	141.67	56	0	33.05904788	31.25489631	30.85593448	24.48880736	22.66494156	22.32191566	42.86425729	41.57869157	41.29076936
2-methylpyrazine	6	C	141.9	50	0	33.93563609	34.37625622	34.13737872	27.55021785	28.07274671	27.81249092	46.46175851	45.7161199	45.51110801
isoprene	21	C	142.46	38	0	30.18700033	28.47466159	27.97806377	22.72962931	21.00337643	20.50044553	41.68424733	39.83872041	39.34782674
Furan	68	C	142.8	36	0	34.88747985	34.6832347	34.20407914	27.19998877	27.06294062	26.51559851	45.53710838	45.68117714	45.06593664
Norbornadiene	100	C	143.2	50	0	28.31465532	27.89840825	27.64192018	22.52888534	22.19396558	21.93888074	43.38294763	42.77743632	42.56273155
2-methylpyrazine	6	C	143.9	50	0	31.69638699	31.98165406	31.76477296	25.42281572	25.83742647	25.60366536	44.53032714	44.02119625	43.82276911
ethyl cyanoformate	23	C	144.44	52	0	31.35793815	28.77607727	29.00978158	24.43119931	21.74334765	22.00586853	42.15122923	39.46518687	39.73295688
2-methylpyrazine	6	C	144.85	50	0	31.38840747	31.26354973	30.89097137	25.1733941	25.10937465	24.71874143	43.96877095	42.66392306	42.37467375
1,4-Pyrazine	74	C	146.1	42	0	30.26078309	30.61799382	30.3723018	23.87565741	24.34035211	24.06883108	43.02075525	42.82970326	42.63012972
diketene	19	C	147.66	44	0	23.83103165	23.94056265	23.66646933	15.58823941	15.94071112	15.59733603	33.31228535	32.44953587	31.80413551
Nitrobenzene	97	C	148.3	64	0	29.34049785	29.27140808	30.29772572	20.67014556	20.44809767	21.57734999	39.73479912	35.32123124	36.4365813
Furfural	86	C	148.6	50	0	30.01403991	30.1608235	29.58617794	22.41176997	22.86038435	22.22287433	40.97294672	40.38815164	39.88995281
2,3-Dichloro-2,3-dehydrobutyrolactone	71	C	148.9	76	0	21.77547807	18.4526534	18.5383846	12.98834255	10.09015273	10.30980198	34.1878302	31.25610124	31.7355684
Isoxazole	54	C	149.08	36	0	28.85476122	28.40205145	28.03613021	21.74096518	21.32904537	20.9075217	41.98933907	42.27556211	42.01775468
3,3-Dimethyl-1-butene	87	C	149.8	48	0	21.94979617	19.81576816	19.38814278	15.60527251	13.40519787	12.98551072	35.8270708	33.79707338	33.38483909
pyridine	5	C	149.94	42	0	24.58993462	25.15656917	24.64535568	18.12290382	18.73687758	18.24933051	37.9104503	39.22037155	38.84360746
Cyclohexenone	94	C	150.6	52	0	24.38391007	20.35458571	19.30962642	18.47747627	14.72243706	13.65237832	37.6214333	28.30663522	27.33375102
methylenecyclobutane	7	C	150.62	38	0	21.63305764	17.61443387	17.15827459	13.95162751	9.97931038	9.51433252	32.29448136	29.49448887	29.10633787
N,N-Dimethylaniline	102	C	150.7	66	0	29.42602553	25.63829122	25.04516726	20.89493905	17.27681232	16.74176877	39.63532234	33.7316553	33.43389861
Methylthiazole	72	C	152.14	52	0	24.02805111	23.37202101	23.24860549	16.08571588	15.47378761	15.28805606	39.02935502	38.82277595	38.83531589
1,2-Pyrazine	75	C	152.6	42	0	24.57812735	25.1891943	24.9542095	17.93447112	18.69033115	18.42550327	38.12355519	38.6881328	38.49865626
Furfural	86	C	153.3	50	0	22.04019207	21.58553415	21.83362471	13.15221027	12.58884846	12.85267465	31.54510327	29.69762291	29.97001316
tert-butyl isocyanide	22	C	153.39	46	0	7.39480206	10.17944648	11.19958284	4.21842989	7.27143089	8.34478393	28.39795899	35.85169285	36.76324599
Methylthiazole	72	C	153.49	52	0	20.9268323	20.60289364	20.18202586	13.73055676	13.4414129	12.93905038	32.37523732	31.20546006	30.82451199
2-methylpyrazine	6	C	154.11	50	0	20.21562608	18.48889679	18.14437829	12.70535013	10.95766221	10.58637449	32.7602619	29.7276776	29.41223132
crotonaldehyde (trans-2-butenal) s-trans	1	C	154.32	38	0	18.26163083	10.75031413	8.31731325	12.94428319	5.70543614	3.30144411	32.58799812	22.12962794	19.84764931
ethylene carbonate	12	C	155.92	46	0	23.21843438	20.87018763	20.36161046	15.66939962	13.00160184	12.49599625	31.14083555	26.83098864	26.63029298
Pyrimidine	73	C	157.6	42	0	18.32556132	18.90814973	18.62043394	12.16493159	12.9256261	12.64731135	32.81590558	33.36226409	33.16771303
Isoxazole	54	C	157.81	36	0	19.10673456	18.90029335	18.44585155	11.31171975	11.2872186	10.73696787	31.64464174	31.9805001	31.58901001
Pyrimidine	73	C	159.2	42	0	14.11491182	15.13941805	14.9107475	7.32609693	8.31717032	8.10402734	26.62473694	27.8984642	27.76843046
Anisole (methoxybenzene)	101	C	159.9	58	0	15.6474192	15.34412558	15.075007	7.29534548	6.94971197	6.65969307	26.9848007	26.15304524	25.9264709
N,N-Dimethylformamide	49	C	162.5	40	0	17.45505593	15.59469714	14.45722095	10.9489042	8.88175422	7.66378698	31.34561743	28.65725102	27.71124993
Fluorobenzene	95	C	163.3	50	0	10.08299733	10.40999026	10.1355267	1.53492188	1.9206549	1.59054884	20.59544633	19.95600925	19.60843774
maleic anhydride	3	C	164.58	50	0	10.64223651	7.1472036	6.378337545	2.96974949	-0.47991631	-1.3551489	19.06232716	15.78239445	15.1384512
diketene	19	C	165.18	44	0	12.65364216	7.67712838	6.41226078	5.01966347	-0.24596754	-1.61519745	22.91981636	18.68815682	17.64912351
Cyclopentenone	84	C	165.25	44	0	8.21609264	6.29307683	4.8288399	2.66852333	1.15237614	-0.30153712	22.88369913	18.78035713	17.49297586
2,3-Dichloro-2,3-dehydrobutyrolactone	71	C	165.7	76	0	12.64911801	9.86803053	9.02482529	5.33881344	2.25456218	1.36578689	23.45729977	21.62870674	20.88821434
1,3,5-triazine	18	C	166.14	42	0	7.856794417	7.334131317	7.284338563	1.36400541	0.903018503	0.84937914	21.11656133	20.650087	20.88117196
beta-butyrolactone	15	C	168.39	46	0	11.64850186	5.79723178	4.22604494	3.94001524	-2.28074378	-3.90634756	22.58415372	17.28060411	15.99919508
N,N-Dimethylacetamide ((Me)2NCOCH3))	64	C	170	48	0	10.44189818	7.35056262	6.1257175	2.7275679	-0.73891521	-2.029623	23.81581138	19.69888637	18.72240096
Methyl acetate Z	48	C	171.2	40	0	4.6182317	1.41114949	0.52384478	-3.14613408	-6.62159968	-7.57490057	15.97736291	12.04760733	11.77779479
gamma-Butyrolactone (C4H6O2)	66	C	177.9	46	0	1.55201299	-4.00690017	-5.28695705	-6.07194882	-12.07851036	-13.42515067	12.59620988	7.1816582	6.24501043
Furfural	86	C	178.1	50	0	-2.58702595	-4.61267427	-6.12628206	-8.42911353	-10.42637133	-12.06021628	14.45145822	15.03924455	13.87181726
3-Butyn-2-one	69	C	183.8	36	0	-8.4115307	-13.17002953	-14.78292755	-15.74299151	-20.77150013	-22.41295949	7.0627053	2.52381164	1.22330364
1,4-Benzoquinone	98	C	187.2	56	0	-14.71865298	-16.31879849	-17.54896913	-22.17768805	-23.85697854	-25.17678323	-1.44320901	5.23921778	4.259317115
1,1,1-Trichloroacetone	50	C	187.44	80	0	-13.79347855	-19.21699339	-20.2731681	-20.81709658	-26.51221074	-27.83364	1.1736229	-3.49512205	-4.32910341
crotonaldehyde (trans-2-butenal) s-trans	1	C	194.04	38	0	-16.59842429	-20.91193187	-22.93310744	-22.91696388	-27.3648497	-29.495789	-0.30811232	-1.40109927	-3.03449829
Cyclohexenone	94	C	198.7	52	0	-21.76533451	-26.87602864	-28.81942677	-29.48117817	-34.95183944	-37.0494959	-5.92276694	-8.51643316	-10.14625391
Acetaldehyde	36	C	199.7	24	0	-23.07344402	-30.44503693	-32.6855692	-29.66832282	-37.2116511	-39.5686681	-7.60447512	-14.21216257	-15.96110668
Acetone	46	C	205.8	32	0	-29.88942689	-37.89631295	-40.31101984	-37.7951781	-46.07817012	-48.64918987	-15.17272679	-24.69425817	-26.76052097
pivalaldehyde	20	C	205.83	48	0	-31.0995283	-37.06830712	-38.8252017	-38.19902137	-44.34689119	-46.2728521	-15.27149205	-20.40031846	-21.8056515
Cyclobutanone	65	C	208.9	38	0	-34.08337282	-44.34995679	-46.93373255	-42.07195711	-52.76335231	-55.42862949	-20.00946258	-29.20557392	-31.65285657
Cyclopentenone	84	C	210.45	44	0	-31.84711404	-38.62817672	-40.60228187	-39.75593397	-46.89949194	-48.95726167	-16.00726314	-20.12171866	-21.67644808
Cyclohexanone	93	C	211.2	54	0	-35.77261923	-43.88100161	-46.05892051	-43.8982645	-52.45263568	-54.76262135	-20.36629987	-27.04278703	-28.90595844
Cyclopentanone	82	C	219.6	46	0	-44.12457325	-53.29714366	-55.53315761	-52.60325795	-62.28987447	-64.64371658	-28.96990412	-37.62629896	-39.45310358
Thiirane	39	C	18.7	32	1	166.9509516	170.1274137	168.9551016	158.7708775	162.2214763	160.8696092	166.8799198	169.8692762	168.7396769
ethyl sulfide	13	C	25.5	50	1	151.3142685	153.6632682	153.7203157	143.2047255	145.6533749	145.6892818	150.3383116	152.475885	152.5398146
2-Chloropropanitrile	53	C	37.83	46	1	141.4155884	144.596018	143.9217743	131.7117513	135.0478764	134.1645766	138.8390601	139.9510191	139.2496931
Chloroethane	29	C	39.9	34	1	140.0782983	142.4739031	140.7400191	129.986744	132.2867947	130.2702685	138.8163084	140.0372598	138.4120149
Dimethylsulfoxide	38	C	40.6	42	1	142.6551224	146.659185	147.9052107	134.9963165	139.4048582	140.7080809	144.4118402	148.9161331	150.0889384
2-Chloropropane	43	C	53.6	42	1	125.6127779	125.3264615	122.8350446	113.2714098	112.608804	109.4122974	123.7523825	122.4633965	120.0701783
Dichloromethane	25	C	53.7	42	1	119.6260842	124.7104206	123.5960273	107.5026379	112.7913456	111.6644835	116.0792317	120.7315228	119.5672413
t-Butyl chloride	60	C	66.5	50	1	113.1378601	109.1947094	105.7975095	98.20035698	93.48318717	89.0188985	110.9653957	106.742274	103.301394
Chloroform	26	C	77.2	58	1	84.19082677	88.54194428	87.77090337	68.48275272	73.08267561	72.20695749	79.24911397	83.00864433	82.22358399
1,1,1-Trichloroethane	30	C	95.2	66	1	63.38096814	62.51964253	61.43665964	44.8056306	43.92375565	42.7032882	58.73355784	57.59091319	56.38973248
1,1,1-Trichloroacetone	50	C	96.32	80	1	65.95113144	66.11710065	65.90141051	48.20510474	48.611917	48.41544665	61.55820876	62.03865876	61.80658929
1-Chloro-2-methyl-1-propene	62	C	111.64	48	1	60.25260643	62.88806229	62.36144381	52.47511016	55.20348452	54.58990656	70.02674845	70.63536414	69.96358896
Trichloroethylene	35	C	116.7	64	1	55.77099534	56.81294961	56.85510913	48.17625719	49.5131416	49.5507411	67.36221094	68.31191395	68.28093965
trans-1,2-Dichloroethylene	34	C	120.3	48	1	50.36280916	51.58389908	51.60187058	42.89108119	44.37775688	44.3543096	62.01948368	62.96187285	62.91750465
2-methylthiophene	10	C	123.03	52	1	51.86549972	51.01507886	50.61190951	43.61962618	42.86325301	42.43348981	65.0377331	63.71709233	63.35458378
Trichloroethylene	35	C	124.1	64	1	40.81107641	42.5997008	42.46815218	29.76888192	31.90587691	31.73395046	51.2265465	52.57513133	52.43346251
Thiophene	70	C	125	44	1	51.23356404	50.7908405	50.39044773	42.94122704	42.63080159	42.22602212	65.00581474	64.41080589	64.12784863
methyl isothiocyanate	0	C	128.9	38	1	51.60994276	53.3132937	52.95124797	38.8026544	39.79481535	47.60756389	48.77903558	48.1126905	54.01717212
1,1--Dichloroethylene	33	C	128.9	48	1	32.55303643	35.27866282	34.98284588	21.29617091	24.35540456	23.98958817	42.27151805	44.02463232	43.63672938
allyl isothiocyanate	17	C	132.02	52	1	40.55394862	41.03557968	52.05299706	33.2844673	33.60323539	45.97890638	46.82255935	45.63447914	49.06652609
2-Chloropropene	44	C	138.56	40	1	28.29177722	27.44392111	26.63494579	18.43235561	17.63473896	16.6877298	38.72481204	36.8417914	35.8895631
2-methylthiophene	10	C	139.5	52	1	33.59811315	31.01812527	30.42072797	23.53357329	20.99632837	20.36553751	47.03907763	44.04378475	43.45090001
Acetyl chloride	40	C	170.3	40	1	0.3560185	-4.73750477	-5.54525171	-8.33257639	-13.3715709	-14.12487207	10.51304216	5.7457358	4.95519135
Dichloromethane	25	CL		42	0	754.6415007	777.1357273	712.52909	737.6993302	737.2120539	759.8572791	751.4254977	774.4318743	0
Chloroform	26	CL		58	0	559.7604993	573.0287639	506.7749559	521.4880443	535.9318452	548.8324224	555.9724439	569.4984121	0
Chloroethane	29	CL		34	0	836.9122304	857.9715869	802.7456029	828.0882954	824.7042049	855.6097522	835.2805319	856.7431816	0
1,1,1-Trichloroethane	30	CL		66	0	473.9269464	479.0778482	416.7542857	423.0451702	457.0006103	463.0340683	469.6969122	474.8423429	0
Chlorodimethylsilane ((CH3)2SiHCl)	32	CL		50	0	946.6313285	953.0785453	932.5363848	941.3865408	944.630082	949.6587703	947.6315707	954.0268875	0
1,1--Dichloroethylene	33	CL		48	0	608.6735362	617.6860614	571.5628945	581.9239446	598.4526188	607.1874975	605.6439209	614.7966828	0
trans-1,2-Dichloroethylene	34	CL		48	0	740.4236907	750.531095	709.7744355	721.5215427	726.8428144	736.5137035	737.5401879	747.9038016	0
Trichloroethylene	35	CL		64	0	629.0666609	631.7579812	588.9678977	592.6095544	618.4954815	620.4603287	625.1036745	628.0179001	0
Acetyl chloride	40	CL		40	0	474.3486677	484.4714223	430.578853	444.7853233	476.2151908	482.7622335	470.057438	480.6952812	0
2-Chloropropane	43	CL		42	0	747.346437	767.5608607	709.727052	734.7009221	742.1948461	767.9628136	746.520099	767.0832526	0
2-Chloropropene	44	CL		40	0	676.156685	688.1633086	645.5282584	660.0273345	671.5705103	676.348448	674.2491	686.4879689	0
Allyl chloride	45	CL		40	0	824.3359584	844.2844744	780.758063	805.3936869	799.6415012	823.4535427	821.4052321	841.6851313	0
1,1,1-Trichloroacetone	50	CL		80	0	557.3032625	568.3608386	503.0417468	515.9489064	544.1777249	551.8409127	552.2851862	563.4016531	0
2-Chloropropanitrile	53	CL		46	0	732.8772516	758.2165518	683.7126268	712.3059659	714.4298699	748.4081791	729.9888571	755.7779352	0
t-Butyl chloride	60	CL		50	0	677.0239553	699.7727874	634.3087815	662.6583689	680.0923484	702.6117325	675.4690023	698.657343	0
1-Chloro-2-methyl-1-propene	62	CL		48	0	763.7233161	779.0725742	736.1932338	754.2524678	749.6961206	773.5925765	761.6278344	777.1235128	0
2,3-Dichloro-2,3-dehydrobutyrolactone	71	CL		76	0	774.453831	790.2455455	744.8885512	762.6478688	761.3949697	772.0752412	771.0177399	786.9591786	0
Chlorobenzene	96	CL		58	0	704.7522127	713.4051867	675.465392	686.1782184	693.6691687	701.6286378	702.7674156	711.6487519	0
Fluorobenzene	95	F		50	0	291.7041901	291.7645735	287.6650139	288.5969212	274.3889981	275.1467416	292.5662954	292.5825082	0
name	molecules number	element	experimental	electrons	relativistic	avg PBE0 gas	avg PBE0 solv	avg B3LYP gas	avg B3LYP solv	avg KT3 gas	avg KT3 solv	avg mPW1PW91 gas	avg mPW1PW91 solv
TMS	104	H	0	49	0	31.51837119	31.46060192	31.44179504	31.67004558	31.61127958	31.59481247	31.92088724	31.8492255	31.83360579
Cyclopropane	42	H	0.22	24	0	31.34005403	31.24764058	31.23532136	31.48390653	31.39640855	31.38754263	31.77150162	31.67376888	31.66598112
Bicyclobutane	59	H	0.44	30	0	31.137252	31.1479172	31.11198836	31.20130918	31.22105284	31.1960157	31.27367818	31.26067379	31.22140218
Chlorodimethylsilane ((CH3)2SiHCl)	32	H	0.54	50	0	31.12246638	31.2349661	31.21793387	31.27287973	31.39648896	31.38153396	31.53342051	31.65835361	31.64424298
(E)-3,4-dimethyl-2-pentene	2	H	0.978	56	0	30.50370438	30.45143515	30.43922479	30.63120544	30.59451728	30.5850316	30.87690151	30.83877973	30.82988562
3,3-Dimethyl-1-butene	87	H	1	48	0	30.52316369	30.47623293	30.46522664	30.67302407	30.61746917	30.60770201	30.91369937	30.86177115	30.85055031
pivalaldehyde	20	H	1.08	48	0	30.54467838	30.46009379	30.44342497	30.68017139	30.5903657	30.57596227	30.92893993	30.83493044	30.81887284
MTBE (methyl t-butyl ether)	79	H	1.12	50	0	30.39581658	30.3350679	30.32213634	30.53550771	30.46870167	30.45692443	30.77035401	30.68691855	30.67555345
t-Butylacetylene	89	H	1.21	46	0	30.31242172	30.39781235	30.38928689	30.45754616	30.5317434	30.5245301	30.66870072	30.74412604	30.73711317
Propionitrile	52	H	1.25	30	0	30.34387875	30.65041184	30.6451336	30.46326568	30.78079355	30.77798944	30.72209994	31.03841348	31.0363928
ethyl sulfide	13	H	1.256	50	0	30.28850048	30.40772274	30.40056541	30.41275243	30.55541931	30.54892622	30.6433259	30.77467016	30.76464024
dimethylacetal	9	H	1.281	50	0	30.37183119	30.3261232	30.31076289	30.49077731	30.44989238	30.43385628	30.75389086	30.70109417	30.68488931
2-Methyl-2-cyanopropane	67	H	1.3	38	0	30.31063497	30.38978367	30.38306611	30.4399916	30.52466118	30.51955578	30.68780181	30.76274893	30.75575602
quadricyclane	24	H	1.345	50	0	30.33680954	30.11732435	30.10440637	30.47125086	30.25574522	30.24520312	30.54572378	30.33526389	30.32481771
Bicyclobutane	59	H	1.37	30	0	30.16663905	29.89034647	29.94018405	30.35301124	30.0782844	30.11242014	30.78297565	30.50598568	30.56918353
2-Methyl-2-cyanopropane	83	H	1.39	46	0	30.27156838	30.12817425	30.12245136	30.41282579	30.26285105	30.25671239	30.64458697	30.51190962	30.50586269
ethyl cyanoformate	23	H	1.394	52	0	30.18367918	31.03471914	31.04314131	30.29635319	31.17535082	31.18684838	30.5612326	31.43898598	31.45090709
Cyclohexane, chair	88	H	1.42	48	0	30.06081612	29.97114088	29.96326629	30.19500801	30.09582217	30.08917358	30.3336399	30.22437264	30.2175231
N-Methylpiperidine	92	H	1.42	56	0	29.97407387	29.99610665	29.98762747	30.09618474	30.10955797	30.10217463	30.23706374	30.23045205	30.2254975
N-Methylpiperidine	92	H	1.42001	56	0	30.16165416	30.12600176	30.12076476	30.29496758	30.26153359	30.25759778	30.46549563	30.41836502	30.41417118
tert-butyl isocyanide	22	H	1.446	46	0	30.18853908	30.03109579	30.01868531	30.32794929	30.16268498	30.14942971	30.55213517	30.36730247	30.35562179
Bicyclobutane	59	H	1.47	30	0	30.16522545	29.95711435	29.92428183	30.28960514	30.08284605	30.06127078	30.28181386	30.07403769	30.0362666
quadricyclane	24	H	1.478	50	0	30.14599114	29.97850462	29.96328671	30.2490786	30.09104243	30.07877144	30.43569091	30.27322719	30.26048272
2-Methyl-2-butene	77	H	1.48	40	0	29.79868728	29.74289798	29.72994044	29.93489503	29.88725668	29.87593797	30.12814169	30.09309841	30.08230653
Chloroethane	29	H	1.5	34	0	30.15363017	30.34128626	30.3245293	30.25438486	30.45712296	30.43849038	30.50849792	30.7049761	30.68660952
Cyclopentane	76	H	1.5	40	0	29.93733241	29.87944314	29.87017725	30.05670742	29.99510501	29.9865115	30.22596593	30.1592638	30.15106203
2-Chloropropane	43	H	1.51	42	0	30.1199554	30.22573438	30.20482254	30.22422062	30.33694566	30.31457563	30.47053168	30.56997109	30.54922534
Nitroethane	31	H	1.55	40	0	30.1808651	30.56417781	30.56549504	30.28874663	30.69508578	30.69557911	30.57013416	30.92400152	30.9310352
(E)-3,4-dimethyl-2-pentene	2	H	1.56	56	0	29.71767914	29.62826708	29.61443176	29.88655897	29.78377656	29.77282788	30.0873381	29.97323504	29.96305466
(E)-3,4-dimethyl-2-pentene	2	H	1.56001	56	0	29.76246395	29.66413996	29.64848913	29.89370255	29.80806337	29.79679216	30.07777738	29.9991968	29.98843922
beta-butyrolactone	15	H	1.563	46	0	30.13629909	30.49150928	30.4857041	30.24690734	30.62208961	30.61786127	30.50350095	30.87548333	30.86835631
2-Methyl-2-butene	77	H	1.58	40	0	29.73939901	29.71159699	29.70091719	29.88537761	29.86500525	29.85613435	30.09008481	30.03541626	30.02665971
2-Methyl-2-butene	77	H	1.58001	40	0	29.79815904	29.7663292	29.75418621	29.93651765	29.90616314	29.89577012	30.14255741	30.11758358	30.10755636
Tetrahydropyran (THP)	80	H	1.59	48	0	30.07303083	30.01310199	30.00532997	30.18665293	30.12382355	30.11726195	30.33575819	30.24713659	30.241273
Tetrahydropyran (THP)	80	H	1.5901	48	0	29.92040705	29.86074122	29.86282868	30.06304942	29.9964848	30.00043004	30.20925192	30.11508835	30.11989534
t-Butyl chloride	60	H	1.61	50	0	30.00204205	30.05283758	30.03078258	30.11925415	30.16403599	30.13726696	30.35492719	30.38457377	30.36080573
2-Methyl-2-nitropropane	61	H	1.61	56	0	30.03195019	29.92970638	29.92216756	30.16208744	30.05404254	30.04711092	30.39386436	30.27876986	30.27297207
Cyclohexene	90	H	1.62	46	0	29.87448044	29.87219948	29.86706372	30.00662356	29.99995795	29.99596083	30.1697825	30.16850244	30.16474648
Cyclopropanone	51	H	1.65	30	0	30.14290372	29.98293363	29.96470727	30.29018198	30.14024507	30.12576369	30.4536467	30.31574427	30.30397258
2-Butyne	57	H	1.7	30	0	29.73722391	29.76020899	29.7536324	29.84840521	29.88925538	29.88534201	29.93604431	30.00257461	29.99068792
Isobutylene	55	H	1.72	32	0	29.69430677	29.68388616	29.670831	29.83603188	29.83114452	29.82137864	30.04422448	30.03593263	30.02463762
1,3-dioxane	8	H	1.78	48	0	29.97360284	29.93905113	29.92246147	30.07312783	30.04434146	30.02674561	30.21553711	30.17509615	30.15774096
N-Methylpyrrolidine	81	H	1.78	48	0	29.75883442	29.70810505	29.70341567	29.87991518	29.83951911	29.83632559	30.07865045	30.02891302	30.02420752
Cyclohexanone	93	H	1.79	54	0	29.7513824	29.62620782	29.62576809	29.88283776	29.74868342	29.74890206	29.97830719	29.79102763	29.79078828
Cyclohexanone	93	H	1.79001	54	0	29.68243523	30.41285101	30.41893353	29.83578948	30.60194714	30.61013599	29.99209107	30.69385838	30.69725942
1-Chloro-2-methyl-1-propene	62	H	1.8	48	0	29.63492901	29.6439517	29.63812505	29.77860632	29.79271046	29.79142696	29.98891742	30.03115604	30.03765
1-Chloro-2-methyl-1-propene	62	H	1.8001	48	0	29.72589071	30.00422186	30.00358716	29.86896404	30.17756032	30.17908349	30.06582415	30.28715515	30.29567437
THF	63	H	1.81	40	0	29.69508775	29.62871541	29.62842865	29.80970062	29.74518592	29.74659733	29.97292383	29.88923957	29.88826214
isoprene	21	H	1.85	38	0	29.59350157	29.57944	29.56928534	29.74297892	29.73587963	29.72712021	29.95731456	29.99062681	29.98168657
2-Chloropropanitrile	53	H	1.85	46	0	29.8888766	30.19648711	30.20248805	30.00520194	30.32617476	30.33229502	30.23580172	30.51139269	30.51678339
Cyclopentene	78	H	1.85	38	0	29.64629081	29.64096403	29.63514757	29.78504459	29.78474194	29.77872691	29.97593522	29.98195227	29.97599367
t-Butylacetylene	89	H	1.89	46	0	29.80657162	29.03558253	28.95689026	30.03243951	29.31077827	29.23693758	30.15034562	29.39115736	29.31761032
methylenecyclobutane	7	H	1.928	38	0	29.64589575	29.69815464	29.69739528	29.76079366	29.81304184	29.80842519	29.9259598	29.98792296	29.98828425
Acetonitrile	41	H	1.94	22	0	29.77422673	29.92560696	29.9133959	29.89382799	30.06565065	30.0566831	30.05762621	30.26478282	30.25461139
Cyclobutane	56	H	1.96	32	0	29.56454013	29.51048135	29.50101455	29.65048225	29.59684146	29.58767093	29.79248285	29.73043395	29.71965974
Norbornadiene	100	H	1.96	50	0	29.39214068	29.40047123	29.38619112	29.55976071	29.59185264	29.57950873	29.56046028	29.61696364	29.60382105
Cyclohexene	90	H	1.97	46	0	29.43339308	29.35997697	29.35525406	29.56988251	29.49717963	29.49393032	29.66447329	29.59301241	29.58989541
N,N-Dimethylacetamide ((Me)2NCOCH3))	64	H	1.98	48	0	29.53256199	29.46667227	29.45362988	29.67273766	29.60448622	29.59652677	29.88794433	29.78550507	29.77240597
Methyl acetate Z	48	H	2	40	0	29.56772833	29.62421557	29.61030497	29.68980814	29.75186804	29.74002511	29.92755826	29.9997479	29.98487288
quadricyclane	24	H	2.013	50	0	29.47332383	29.46002474	29.45133439	29.61330021	29.60847885	29.60143266	29.75173264	29.73334634	29.72611874
Cyclopentanone	82	H	2.02	46	0	29.61764779	29.74762022	29.74850341	29.74545006	29.87897172	29.88023634	29.9176947	30.01874622	30.01930888
Cyclopentanone	82	H	2.0201	46	0	29.46862518	29.20293849	29.15075135	29.61250878	29.34121361	29.28988857	29.80760169	29.49531061	29.4447061
Cyclobutanone	65	H	2.03	38	0	29.61609145	29.75861263	29.74542774	29.76310084	29.9167644	29.90614051	29.98244419	30.1567445	30.13362456
Cyclohexenone	94	H	2.03	52	0	29.54324958	29.78569019	29.80347469	29.67851325	29.92392749	29.94284347	29.78448017	30.02786772	30.04804237
crotonaldehyde (trans-2-butenal) s-trans	1	H	2.032	38	0	29.40736777	30.0311678	30.01810331	29.55822412	30.21654101	30.20562361	29.74449166	30.37632381	30.36415143
gamma-Butyrolactone (C4H6O2)	66	H	2.08	46	0	29.47069115	29.65897555	29.665057	29.58630187	29.79029367	29.79915041	29.76392226	29.96505282	29.97126885
N-Methylpiperidine	92	H	2.1	56	0	29.32915942	29.38158136	29.40215168	29.43660889	29.50313544	29.52585808	29.66692939	29.72603217	29.74795063
Acetone	46	H	2.11	32	0	29.42259192	29.43057302	29.40514834	29.57179807	29.59030124	29.56673306	29.8015321	29.77012666	29.74537757
Acetaldehyde	36	H	2.12	24	0	29.41105566	29.51769801	29.49022349	29.56360432	29.68654153	29.66154589	29.81037744	29.92101137	29.89747067
2-Chloropropene	44	H	2.13	40	0	29.41669814	29.47898945	29.46406469	29.54347711	29.617517	29.60398164	29.73643472	29.78540177	29.77158647
Cyclopentenone	84	H	2.22	44	0	29.30459279	29.3070345	29.24676165	29.46354986	29.46516578	29.40439967	29.67382245	29.69289052	29.63549326
(E)-3,4-dimethyl-2-pentene	2	H	2.221	56	0	29.43617071	29.05731577	29.05802965	29.64391028	29.28439269	29.28954745	29.68088931	29.33250338	29.33788184
N-Methylpiperidine	92	H	2.23	56	0	29.46554867	29.22823268	29.23642048	29.5851268	29.33243361	29.34095892	29.71604885	29.45560131	29.46443343
Cyclohexanone	93	H	2.25	54	0	29.2666224	28.86454756	28.83585413	29.41928224	29.00122638	28.97319446	29.55946253	29.12461834	29.09753739
Thiirane	39	H	2.27	32	0	29.28581332	29.23824965	29.18229012	29.33300448	29.28491664	29.22294211	29.53516003	29.50605154	29.44807358
Cyclopentene	78	H	2.29	38	0	29.05959812	29.02240393	29.01996859	29.180031	29.14705899	29.14347733	29.31431102	29.28799317	29.28429316
Toluene	99	H	2.29	50	0	29.07388164	29.34219718	29.33130906	29.22786388	29.51039547	29.501368	29.4730977	29.79932608	29.79080452
gamma-Butyrolactone (C4H6O2)	66	H	2.31	46	0	29.28946388	29.05748715	28.99996333	29.41596491	29.18271425	29.12305615	29.62498889	29.36269748	29.30497137
Propionitrile	52	H	2.34	30	0	29.36626207	28.83454386	28.83801093	29.49978062	28.96997786	28.97766624	29.59478154	29.047977	29.05630784
N-Methylpyrrolidine	81	H	2.34	48	0	29.24488717	29.32285447	29.33801235	29.34919617	29.44178868	29.45980311	29.53379986	29.62687878	29.64180903
Cyclohexenone	94	H	2.372	52	0	29.15475071	29.4252054	29.42174279	29.30391801	29.59033229	29.58863493	29.43216221	29.68963066	29.6848075
3-Butyn-2-one	69	H	2.38	36	0	29.19749233	29.31050137	29.29165623	29.34974396	29.47766458	29.46026053	29.55749748	29.697576	29.68014509
Cyclohexenone	94	H	2.427	52	0	29.18195737	28.90490705	28.8655203	29.32759	29.03397913	28.99504553	29.4737749	29.22802253	29.1904227
N-Methylpyrrolidine	81	H	2.48	48	0	29.20935017	29.00206629	29.01811087	29.30626824	29.0856245	29.10245939	29.48109414	29.24356556	29.2586347
2-methylthiophene	10	H	2.495	52	0	28.91680766	29.15572523	29.1447939	29.05808374	29.30767069	29.29829428	29.22190973	29.46945328	29.46193152
Dimethylsulfoxide	38	H	2.5	42	0	29.36332571	29.27398375	29.2745812	29.48456284	29.39562192	29.3996067	29.74398539	29.6500004	29.66229796
Methylthiazole	72	H	2.5	52	0	28.95715698	28.90278078	28.89213703	29.10889498	29.07366759	29.06303672	29.31181001	29.3062617	29.29763058
Oxirane	37	H	2.54	24	0	29.08535017	28.93453319	28.90965716	29.14042534	28.99125646	28.96387046	29.35884786	29.20637218	29.18263082
ethyl sulfide	13	H	2.547	50	0	28.92808435	28.6241888	28.62254072	29.0192919	28.66963708	28.66724312	29.10193394	28.78199343	28.76153265
2-methylpyrazine	6	H	2.566	50	0	28.9876221	29.06486562	29.05310774	29.13933647	29.23386033	29.22393162	29.42638986	29.55807335	29.55048953
Cyclobutene	58	H	2.57	30	0	28.87943777	28.83557327	28.82839285	29.01336813	28.97311733	28.96715498	29.06775411	29.038045	29.03260368
1,1,1-Trichloroacetone	50	H	2.64	80	0	29.06833289	29.29881107	29.29867425	29.24343846	29.49271259	29.47145777	29.45382956	29.7338133	29.72981543
Acetyl chloride	40	H	2.66	40	0	29.02890432	29.1771771	29.16065549	29.16062485	29.32987654	29.31377196	29.36030859	29.50257708	29.48790418
methylenecyclobutane	7	H	2.685	38	0	28.79133547	28.74199817	28.74297766	28.89728778	28.83697174	28.83385989	28.96784897	28.90774697	28.91080104
Cyclopentenone	84	H	2.69	44	0	28.83980804	29.06256321	29.06105325	28.99133834	29.23641789	29.23686058	29.08024052	29.29935627	29.29823421
1,1,1-Trichloroethane	30	H	2.7	66	0	29.16022467	29.25694081	29.25651191	29.27960714	29.37810096	29.37630989	29.39105201	29.47860305	29.4786338
2-Methyl-2-cyanopropane	67	H	2.7	38	0	29.01493591	27.83734043	27.85338288	29.15969914	27.94713582	27.96575875	29.18773351	27.98273532	27.9993541
Oxetane	47	H	2.72	32	0	28.9692417	28.91407975	28.9153572	29.06731816	29.01736214	29.01831495	29.20314559	29.11523931	29.11645461
N,N-Dimethylformamide	49	H	2.81	40	0	28.69430725	28.93757493	28.94791318	28.81832934	29.06809546	29.07931016	29.01651416	29.24012012	29.2533022
N,N-Dimethylacetamide ((Me)2NCOCH3))	64	H	2.83	48	0	28.57406438	28.72640751	28.74132593	28.71347339	28.85976042	28.88239839	28.87329531	28.97638808	28.9924945
N,N-Dimethylaniline	102	H	2.85	66	0	28.49276723	28.62745068	28.64808047	28.64968698	28.79289068	28.81334894	28.9060458	29.01989871	29.03389362
dimethylcyanamide	16	H	2.853	38	0	28.88248714	28.83424949	28.83245486	28.99154421	28.944952	28.94377577	29.20626188	29.09912375	29.09350907
N,N-Dimethylformamide	49	H	2.98	40	0	28.66044462	28.56300704	28.57566373	28.78124883	28.68133475	28.6909853	28.96874956	28.86579382	28.87893579
N,N-Dimethylacetamide ((Me)2NCOCH3))	64	H	3.01	48	0	28.5644587	28.42721128	28.44377279	28.69283693	28.55782911	28.57673707	28.8736053	28.69471122	28.70921027
Cyclobutanone	65	H	3.08	38	0	28.43231985	28.26605067	28.27060121	28.58056113	28.41398181	28.4221606	28.58943044	28.39782296	28.35905008
beta-butyrolactone	15	H	3.083	46	0	28.75633992	28.31664649	28.3292156	28.87171766	28.42067258	28.43936432	28.98496683	28.51235984	28.52887603
MTBE (methyl t-butyl ether)	79	H	3.11	50	0	28.26845135	28.03929244	28.04065593	28.35824671	28.12440968	28.12689791	28.53215751	28.29539741	28.29762341
dimethylacetal	9	H	3.309	50	0	28.17824087	28.10172793	28.10059437	28.26408786	28.18842746	28.18754941	28.43939661	28.34546214	28.34526473
methyl isothiocyanate	0	H	3.325	38	0	28.31860062	28.95528639	28.98147334	28.48629801	28.97618962	29.1078784	28.68784907	28.98739376	28.99485689
3-Butyn-2-one	69	H	3.4	36	0	28.75203504	27.93573019	27.83745385	28.94336262	28.14215662	28.04436663	28.93585948	28.0195331	27.92093514
Methanol	27	H	3.5	18	0	27.96388735	27.86840919	27.87345779	28.02181312	27.92357487	27.92714439	28.19701353	28.10157366	28.10590387
Norbornadiene	100	H	3.52	50	0	27.90131323	27.79360142	27.79175445	28.07337551	27.9562411	27.95572808	28.136483	28.02702705	28.0267801
beta-butyrolactone	15	H	3.56	46	0	28.21327047	27.82360648	27.84029772	28.33470107	27.94814845	27.97251761	28.41439189	28.00595247	28.03705897
Tetrahydropyran (THP)	80	H	3.56	48	0	27.91457301	27.74627116	27.74491331	28.01499479	27.83719812	27.8364451	28.10800928	27.93834087	27.93756701
Chloroethane	29	H	3.6	34	0	27.97019573	27.6477693	27.5856981	28.0031406	27.65239253	27.57701318	28.13371552	27.78980513	27.72464028
malononitrile	11	H	3.604	34	0	28.34853648	27.93695598	27.92686604	28.48527428	28.0821958	28.0761135	28.4688488	28.0676532	28.06297925
N-Methylpyrrole	85	H	3.62	44	0	27.88982282	28.19919304	28.19694965	28.0226672	28.34409862	28.34183148	28.18732392	28.5804312	28.57597236
Methyl acetate Z	48	H	3.65	40	0	27.96319948	27.85452855	27.83289016	28.04501668	27.93842447	27.91487845	28.25277789	28.12517087	28.11222508
Anisole (methoxybenzene)	101	H	3.7	58	0	27.76895765	27.82531846	27.82436103	27.86865355	27.94529614	27.94360181	28.07228822	28.14395937	28.14285705
THF	63	H	3.71	40	0	27.67732664	27.59944746	27.60358972	27.75108425	27.66999832	27.67517513	27.83820103	27.75939504	27.76579968
diketene	19	H	3.897	44	0	27.87051693	27.48795882	27.48824319	27.98571416	27.60689365	27.61091608	28.0170762	27.64437304	27.60926636
1,3-dioxane	8	H	3.912	48	0	27.69717422	27.43029969	27.42770676	27.80302631	27.5265448	27.52386648	27.88414554	27.6284936	27.62642747
Allyl chloride	45	H	3.99	40	0	27.48181605	27.26163538	27.22571013	27.55088249	27.31608948	27.26171359	27.66496864	27.46083922	27.41510854
2-Chloropropane	43	H	4.11	42	0	27.35545129	26.76099538	26.67498035	27.35707987	26.69665978	26.58086743	27.44258799	26.80972564	26.71497446
allyl isothiocyanate	17	H	4.147	52	0	27.66163742	27.42093154	27.30417841	27.82469707	27.58828909	27.48324711	27.94987863	27.67460952	27.61363156
Nitromethane	28	H	4.22	32	0	27.43933092	27.33162164	27.31493037	27.53518835	27.42715944	27.41363548	27.75539017	27.65652027	27.64099628
gamma-Butyrolactone (C4H6O2)	66	H	4.38	46	0	27.37280203	27.06676323	27.02223891	27.44547323	27.12855698	27.07322829	27.57846636	27.26710958	27.22006494
Nitroethane	31	H	4.4	40	0	27.3356105	26.62406732	26.5873397	27.43050135	26.68211692	26.64645048	27.59590008	26.86501757	26.84710149
ethyl cyanoformate	23	H	4.412	52	0	27.39945034	26.32518926	26.25365513	27.47674037	26.36427355	26.28589445	27.57856353	26.40968036	26.32210088
diketene	19	H	4.494	44	0	26.95358009	26.81141707	26.78546381	27.15323627	27.0332006	27.0076675	27.42607997	27.27068813	27.23145841
2-Chloropropanitrile	53	H	4.53	46	0	27.10741699	25.80523448	25.80846853	27.18844897	25.83979981	25.83525568	27.15919693	25.84247871	25.84659467
ethylene carbonate	12	H	4.541	46	0	27.29165382	26.99464057	26.9527234	27.36043893	27.0623887	27.01679933	27.52370013	27.32640159	27.28844728
dimethylacetal	9	H	4.568	50	0	27.41635077	27.09020182	27.11953087	27.48692416	27.11242864	27.1441413	27.45558165	27.08884306	27.11121437
Isobutylene	55	H	4.6	32	0	26.50440782	26.28997769	26.26306791	26.74183049	26.52764172	26.5043113	26.93592345	26.7078242	26.68294554
2,5-dihydrofuran	4	H	4.63	38	0	26.61781377	26.59634644	26.6060734	26.71865903	26.69614416	26.70686659	26.73894676	26.73815662	26.74908441
methylenecyclobutane	7	H	4.685	38	0	26.43739314	26.15812473	26.13377703	26.6536312	26.40739353	26.38446764	26.86127634	26.5704042	26.54863951
beta-butyrolactone	15	H	4.704	46	0	27.17333553	26.24288894	26.17937181	27.27044629	26.28729219	26.2062488	27.38454712	26.45673338	26.38264372
Oxetane	47	H	4.73	32	0	26.75275651	26.63126393	26.63459333	26.85142008	26.72305934	26.72654259	26.87267129	26.74569222	26.75274316
3,3-Dimethyl-1-butene	87	H	4.78	48	0	26.29530913	25.94418437	25.92003015	26.57065479	26.2140853	26.19107594	26.797117	26.44591875	26.42004192
3,3-Dimethyl-1-butene	87	H	4.82	48	0	26.29778506	25.98324145	25.96028522	26.53758757	26.24450777	26.22356958	26.75373811	26.41130229	26.38724984
1,3-dioxane	8	H	4.853	48	0	26.69645321	26.44480132	26.43954047	26.75908798	26.50115656	26.49507216	26.78253702	26.54511893	26.53653123
diketene	19	H	4.877	44	0	26.44741521	26.3670246	26.29903316	26.63528846	26.567956	26.50082332	26.91928524	26.77565173	26.69525173
Chlorodimethylsilane ((CH3)2SiHCl)	32	H	4.88	50	0	26.10052722	25.82447493	25.78834604	26.32478844	26.01269944	25.97323738	26.4010621	26.1133454	26.07844171
2,3-Dichloro-2,3-dehydrobutyrolactone	71	H	4.9	76	0	26.92211342	26.66083022	26.64745413	27.02680449	26.75544527	26.74209996	27.15534227	26.92296621	26.90502017
isoprene	21	H	4.99	38	0	26.17809794	25.82444595	25.79916544	26.42226376	26.08782553	26.06485806	26.64762157	26.29547661	26.27184089
isoprene	21	H	5.06	38	0	26.10266057	25.7452053	25.72864485	26.35760528	26.02423804	26.00897405	26.64340747	26.27788212	26.26275155
2-Chloropropene	44	H	5.12	40	0	26.17964156	25.838775	25.81840321	26.4031277	26.06701013	26.04840743	26.62833843	26.26897426	26.25002257
2-Methyl-2-butene	77	H	5.12	40	0	25.91923948	25.54695714	25.53029196	26.13199461	25.74762542	25.73281458	26.27667274	25.84372915	25.82900373
Allyl chloride	45	H	5.15	40	0	26.05544028	25.93051924	25.88967328	26.27073485	26.16929249	26.13228824	26.51876432	26.36249981	26.3220296
isoprene	21	H	5.19	38	0	26.05437819	25.7987356	25.77432219	26.32726242	26.06613734	26.04322285	26.55403406	26.32071393	26.29815776
(E)-3,4-dimethyl-2-pentene	2	H	5.222	56	0	25.97775391	25.55658966	25.53626282	26.176565	25.67575298	25.65677688	26.29007167	25.80406585	25.78439717
Dichloromethane	25	H	5.28	42	0	26.11844562	25.67505294	25.64933466	26.11944023	25.65495076	25.62576589	26.04295762	25.63297465	25.60279334
Allyl chloride	45	H	5.29	40	0	25.94698404	25.70853957	25.65265451	26.16087492	25.92558856	25.87450869	26.41230919	26.16020719	26.10663566
allyl isothiocyanate	17	H	5.3	52	0	25.94190394	26.13543276	26.25889904	26.18452092	26.40371644	26.53647827	26.41804353	26.42112936	26.46892812
allyl isothiocyanate	17	H	5.41	52	0	25.92795393	25.90288201	25.86297138	26.17060685	26.16823562	26.13002423	26.41321872	26.2773848	26.31198247
1,1--Dichloroethylene	33	H	5.5	48	0	25.9209346	25.58557053	25.57218101	26.13732538	25.80782157	25.79511104	26.38102108	26.06063747	26.04776511
Cyclohexene	90	H	5.58	46	0	25.3892395	25.09330336	25.073483	25.60187361	25.30476762	25.28657109	25.74334297	25.43380999	25.41523461
Cyclopentene	78	H	5.66	38	0	25.36651244	25.10781118	25.08658414	25.57854677	25.32093088	25.30226407	25.68440722	25.40987802	25.39111977
1-Chloro-2-methyl-1-propene	62	H	5.79	48	0	25.48272347	25.00365589	24.95886107	25.59919081	25.10741428	25.06524705	25.7498712	25.12248443	25.03503353
3,3-Dimethyl-1-butene	87	H	5.8	48	0	25.21564866	24.62906815	24.60918655	25.45213177	24.82591032	24.80758871	25.60050896	24.95292715	24.93094874
allyl isothiocyanate	17	H	5.83	52	0	25.11078129	24.46270005	24.58058345	25.3111642	24.64105516	24.75931789	25.38983286	24.78819678	24.77240418
2,5-dihydrofuran	4	H	5.89	38	0	25.34105465	24.99341081	24.99930993	25.54088904	25.19889345	25.20498292	25.65774358	25.27765895	25.28337389
Allyl chloride	45	H	5.9	40	0	25.14311293	24.7634525	24.70733316	25.3219501	24.92430778	24.8725419	25.50648403	25.09460618	25.04044449
Cyclobutene	58	H	5.95	30	0	25.06502075	24.85730437	24.83447911	25.24234166	25.04166549	25.02064965	25.38552024	25.19667979	25.17555645
Cyclohexenone	94	H	6.009	52	0	25.21807836	25.15944497	25.10344794	25.43932411	25.37978798	25.3246679	25.6421097	25.15520004	25.09770878
Cyclopentenone	84	H	6.09	44	0	25.06235957	24.87478436	24.82658587	25.29341068	25.09610477	25.04725262	25.47043133	25.02458457	24.97881318
N-Methylpyrrole	85	H	6.11	44	0	25.04965413	24.81592406	24.77636263	25.22501895	25.00060589	24.96441236	25.42572172	24.98827223	24.95427429
crotonaldehyde (trans-2-butenal) s-trans	1	H	6.145	38	0	25.13837458	24.63715904	24.5529448	25.36421614	24.85127026	24.76955356	25.55231103	24.82773774	24.7520883
fumaronitrile	14	H	6.295	40	0	25.24605575	24.36395075	24.34367648	25.48072984	24.58282696	24.56523369	25.66302758	24.60972468	24.58901848
Furan	68	H	6.3	36	0	24.80580769	24.42111525	24.40549749	24.9902874	24.60241596	24.58986952	25.19035448	24.78454438	24.79796169
Isoxazole	54	H	6.32	36	0	24.99560803	24.44744631	24.45525791	25.22223071	24.67130273	24.68621671	25.40831137	24.78845389	24.80193611
trans-1,2-Dichloroethylene	34	H	6.36	48	0	25.00432581	24.61008821	24.56580425	25.12581493	24.71833795	24.67348356	25.34974181	24.95859794	24.91045885
Indole	103	H	6.38	62	0	24.63355064	24.57236382	24.54210303	24.82699599	24.77898101	24.75332637	25.05267625	24.86082339	24.83817151
isoprene	21	H	6.44	38	0	24.55577206	24.06320889	24.03631779	24.79430196	24.2952615	24.27058416	24.97493862	24.44494561	24.41959945
Trichloroethylene	35	H	6.49	64	0	25.0556896	24.55617206	24.53086331	25.17892007	24.6664058	24.64116284	25.42183499	24.9532239	24.92576462
N,N-Dimethylaniline	102	H	6.5	66	0	24.46264707	23.64189162	23.61925125	24.68770657	23.90953403	23.89248374	24.96379055	23.58663235	23.56599011
Furfural	86	H	6.52	50	0	24.64950505	24.20697775	24.18108506	24.83810478	24.41265416	24.39010487	25.06190958	24.5853334	24.56248767
N,N-Dimethylaniline	102	H	6.56	66	0	24.7006908	23.84156341	23.79927342	24.93147283	24.04052942	24.00614766	25.02979426	24.05305384	24.03116361
N-Methylpyrrole	85	H	6.57	44	0	24.812207	24.13677109	24.12051668	24.96953157	24.3003305	24.28663089	25.11496112	24.47562094	24.46191705
Norbornadiene	100	H	6.69	50	0	24.25457464	23.98362397	23.96276881	24.46279743	24.19423639	24.17504017	24.67126098	24.38969052	24.37082654
2-methylthiophene	10	H	6.754	52	0	24.51522086	23.9573525	23.94241367	24.74056668	24.18603303	24.17390676	24.85073485	24.28333768	24.27079062
Indole	103	H	6.76	62	0	24.21788943	23.76971194	23.7698901	24.40246389	23.97962048	23.98033795	24.60176651	24.14084385	24.14274212
1,4-Benzoquinone	98	H	6.79	56	0	24.64852304	24.065566	24.03733035	24.88229927	24.31274823	24.28608674	25.1598595	24.06242312	24.04511087
Anisole (methoxybenzene)	101	H	6.8	58	0	24.32547969	23.62634205	23.6084861	24.56072994	23.87696553	23.86077992	24.80664582	24.055612	24.04061593
crotonaldehyde (trans-2-butenal) s-trans	1	H	6.88	38	0	24.47179841	23.06657891	22.98496781	24.72342016	23.28884511	23.21078766	24.92824551	23.31997567	23.24130029
2-methylthiophene	10	H	6.89	52	0	24.40589756	23.9233321	23.90966218	24.63587633	24.16698272	24.15575073	24.76258298	24.26970678	24.2586885
Thiophene	70	H	6.9	44	0	24.0647805	23.67966938	23.66550293	24.29094101	23.91913483	23.90614299	24.41230953	24.02584249	24.01442465
Methylthiazole	72	H	6.92	52	0	24.57641068	23.90864707	23.88574605	24.74809708	24.07542789	24.05488228	24.95079072	24.29338538	24.27149405
Fluorobenzene	95	H	7.03	50	0	24.16285548	23.73460056	23.70525142	24.3649504	23.95708631	23.92684727	24.64851949	24.23755295	24.20842019
Indole	103	H	7.03	62	0	23.98549408	23.15004317	23.13258006	24.21551882	23.4148298	23.39905558	24.45829415	23.39342359	23.3778387
Cyclohexenone	94	H	7.034	52	0	24.2310317	23.30258133	23.27225724	24.46404912	23.53092383	23.50237244	24.62840186	23.48536403	23.4648217
Toluene	99	H	7.0399	50	0	24.02144407	23.33715883	23.31698642	24.25433301	23.60578291	23.58727472	24.48962236	23.67647096	23.65797335
Toluene	99	H	7.04	50	0	23.90985436	23.37444231	23.35767235	24.1428513	23.62419621	23.60893996	24.39684398	23.78698889	23.77190133
Toluene	99	H	7.0401	50	0	23.96699158	23.34926819	23.33198072	24.20198259	23.58710496	23.57152724	24.45364916	23.88683476	23.87189417
maleic anhydride	3	H	7.048	50	0	24.52652074	23.93184553	23.88586161	24.75793691	24.17940804	24.13501522	24.99970799	23.81249368	23.77209506
2-methylthiophene	10	H	7.07	52	0	24.21984649	23.61877969	23.57911734	24.38625637	23.80228349	23.76469346	24.63346056	24.0306216	23.99609207
Thiophene	70	H	7.1	44	0	24.01948983	23.57237124	23.53377184	24.18715237	23.74959641	23.71309856	24.43318275	23.99995461	23.95224631
N,N-Dimethylaniline	102	H	7.1	66	0	23.91397749	23.11446197	23.1049113	24.15214711	23.38146429	23.37169428	24.46464656	23.39073819	23.3752655
Furfural	86	H	7.11	50	0	23.90352126	23.607705	23.56279465	24.09110639	23.77423075	23.7288502	24.33608331	23.97950433	23.94197202
Fluorobenzene	95	H	7.13	50	0	24.08355175	23.46899744	23.44979126	24.30251195	23.70153987	23.68703303	24.57663286	23.81089128	23.79675729
Anisole (methoxybenzene)	101	H	7.19	58	0	23.87461321	23.19723995	23.18032823	24.11096016	23.45009969	23.43508165	24.37820557	23.64436854	23.63075421
Chloroform	26	H	7.21	58	0	24.14116127	23.31080327	23.31988012	24.14700282	23.28454166	23.29414371	23.85309516	23.08252989	23.0919194
Chlorobenzene	96	H	7.21999	58	0	24.00601222	23.26694191	23.25805646	24.23320182	23.5257637	23.52127771	24.5298846	23.65787174	23.65432204
Chlorobenzene	96	H	7.22	58	0	23.89948754	23.23614541	23.21843419	24.13382081	23.49269968	23.47931083	24.39961542	23.64082126	23.62874793
Chlorobenzene	96	H	7.22001	58	0	23.83581468	23.55593952	23.53155521	24.05959505	23.78828743	23.7653364	24.34880506	24.08449272	24.06783248
Benzene	91	H	7.23	42	0	23.7830949	23.33741963	23.31985179	24.01864766	23.58772366	23.57170716	24.27393967	23.82249966	23.80695842
pyridine	5	H	7.231	42	0	24.04472238	23.38494216	23.38029026	24.28147712	23.63237568	23.62765342	24.54808708	23.83750407	23.83399789
Fluorobenzene	95	H	7.31	50	0	23.82636166	23.21627084	23.19767698	24.06126501	23.4645885	23.447038	24.30735438	23.6651061	23.64836152
Pyrimidine	73	H	7.32	42	0	24.12793323	23.27544968	23.28125448	24.37204109	23.52603028	23.53171879	24.64866492	23.7423196	23.74995566
Furan	68	H	7.4	36	0	23.890216	23.55566854	23.50927319	24.0089639	23.68520901	23.6439979	24.06651377	23.76987906	23.72260469
1,2-Pyrazine	75	H	7.5	42	0	24.10556181	23.16884314	23.18154468	24.33966103	23.4087913	23.42715404	24.63315692	23.63941615	23.6473544
Indole	103	H	7.5	62	0	23.51342595	23.14073125	23.11655656	23.74487177	23.38230542	23.36063354	23.98397582	23.50021859	23.47951291
Nitrobenzene	97	H	7.519	64	0	23.66444934	23.00838019	22.99036618	23.90167997	23.27659579	23.26067026	24.18274622	23.31713031	23.29945838
Furfural	86	H	7.61	50	0	23.80885895	23.26538779	23.2275892	23.92998267	23.39347616	23.3562273	24.0415108	23.42548421	23.39194772
pyridine	5	H	7.617	42	0	23.59736011	23.00168159	23.00002824	23.83621806	23.23876046	23.23721761	24.11700777	23.5196157	23.51805265
Nitrobenzene	97	H	7.65	64	0	23.48884773	22.60579409	22.59379019	23.72764045	22.86886876	22.85507518	24.06610073	22.95354186	22.94734094
Cyclopentenone	84	H	7.72	44	0	23.46484659	22.72292386	22.67930964	23.70831209	22.96351998	22.92129427	23.83951954	23.03838963	23.00164365
Indole	103	H	7.81	62	0	23.74564688	22.33769322	22.23774897	23.94614263	22.56181616	22.47405645	24.09003222	22.86105768	22.78311398
N,N-Dimethylformamide	49	H	7.89	40	0	23.39823486	23.11217459	23.11498691	23.46396027	23.17516456	23.17801067	23.58528985	23.24418713	23.24127763
Nitrobenzene	97	H	8.193	64	0	22.62994246	22.53729456	22.5359738	22.88411126	22.79947401	22.79537908	23.21804784	23.04107344	23.03862114
Isoxazole	54	H	8.24	36	0	23.14388347	22.61344806	22.56639728	23.28637418	22.74306679	22.70015729	23.45593892	23.02556393	22.98420951
2-methylpyrazine	6	H	8.376	50	0	22.86072927	22.30350433	22.28484578	23.05492821	22.52524926	22.50758537	23.36535375	22.81563941	22.79963659
2-methylpyrazine	6	H	8.453	50	0	22.74372866	22.16371107	22.14973916	22.93866396	22.37880119	22.3661832	23.25728695	22.74093766	22.72865143
1,4-Pyrazine	74	H	8.48	42	0	22.6384869	22.16259539	22.14743765	22.83764604	22.37528806	22.3603382	23.154129	22.73081173	22.71755989
Isoxazole	54	H	8.49	36	0	22.9140073	22.38640942	22.35780017	23.04752549	22.53195139	22.50222971	23.10664682	22.63779378	22.60960547
2-methylpyrazine	6	H	8.568	50	0	22.77246301	22.04032814	22.01950359	22.96637887	22.23561189	22.21593712	23.24676374	22.55080224	22.53470634
pyridine	5	H	8.593	42	0	22.46421908	22.19763321	22.16950159	22.6620476	22.4234765	22.39932624	22.96511607	22.84355385	22.81988734
Methylthiazole	72	H	8.72	52	0	22.79668754	22.38225395	22.34537111	22.94325938	22.53621427	22.50267073	23.20636662	22.87299672	22.83881603
Pyrimidine	73	H	8.74	42	0	22.50541808	22.05407027	22.03652406	22.69569351	22.24929201	22.23505098	22.99914427	22.61864334	22.60231978
Pyrimidine	73	H	9.21	42	0	21.94466708	21.68861586	21.64685101	22.09882403	21.86256718	21.82842188	22.39597702	22.24404415	22.20479258
1,3,5-triazine	18	H	9.231	42	0	22.12713498	21.65527709	21.62279059	22.27204556	21.79687962	21.77008288	22.55634289	22.17680371	22.11255082
1,2-Pyrazine	75	H	9.24	42	0	21.89334676	21.41837351	21.40064276	22.11748839	21.65231248	21.63417073	22.52287277	22.06217516	22.06852077
pivalaldehyde	20	H	9.48	48	0	21.67881783	21.22212143	21.21939932	21.76622623	21.27701405	21.27541116	21.8403692	21.47456274	21.47443367
crotonaldehyde (trans-2-butenal) s-trans	1	H	9.497	38	0	21.60897918	21.46774235	21.45640562	21.73732516	21.59063068	21.57884978	21.8505321	21.82744041	21.81635785
Furfural	86	H	9.63	50	0	21.31450905	21.40114967	21.39863677	21.4456013	21.5389004	21.53824629	21.5714777	21.77996836	21.78020099
Acetaldehyde	36	H	9.69	24	0	21.28138513	21.03061524	21.03788336	21.38131017	21.11720565	21.12603859	21.44524123	21.19276322	21.20486689
Methanol	27	H		18	0	31.8896398	31.21758991	31.16533281	31.90306789	31.25342197	31.20391289	32.32653347	31.70794328	31.6747456
methyl isothiocyanate	0	N		38	0	172.1682648	160.4385575	158.0350715	162.1514947	152.7728824	153.8736535	160.0662599	153.062943	156.4147235
pyridine	5	N		42	0	-100.9852378	-95.60950973	-97.91893144	-111.4533115	-106.1173029	-108.2578973	-71.66306509	-63.30675297	-65.0823496
2-methylpyrazine	6	N		50	0	-114.4411183	-110.8367296	-111.9480537	-124.1397339	-120.3845676	-121.6113305	-83.15082577	-77.86912794	-78.84838722
malononitrile	11	N		34	0	-45.53244444	-31.80064396	-31.75111234	-47.949933	-34.49378828	-34.44732426	-21.28639523	-8.140056	-8.05623576
fumaronitrile	14	N		40	0	-76.38408044	-60.03648948	-59.1048501	-79.13368187	-62.55594836	-61.6507059	-55.29612142	-38.05201126	-37.03998382
dimethylcyanamide	16	N		38	0	232.736224	235.6481125	237.7041243	225.0728772	228.9425749	231.1531918	217.6847165	222.5606886	224.4889192
allyl isothiocyanate	17	N		52	0	153.3123413	145.0162168	148.7565128	146.114269	138.1778082	143.0672362	145.2365818	138.2687244	141.6248848
1,3,5-triazine	18	N		42	0	-56.3699754	-50.66438454	-51.93068842	-67.26965638	-61.26215342	-62.40217204	-34.51880672	-30.65492031	-31.13149688
tert-butyl isocyanide	22	N		46	0	46.22633086	36.71955372	36.88904733	41.49858589	32.0342308	32.17071509	59.34987681	49.02942076	49.20806418
ethyl cyanoformate	23	N		52	0	-40.92691055	-28.42141573	-26.22548366	-43.75526935	-30.95904936	-28.61861574	-15.77442267	-8.33001759	-6.04740415
Nitromethane	28	N		32	0	-150.3474267	-160.1706215	-161.804155	-166.1182028	-176.4537871	-178.1901283	-119.8262278	-129.2700608	-130.7782784
Nitroethane	31	N		40	0	-159.3159437	-168.9030659	-170.5047055	-175.6605471	-185.9546274	-187.8486032	-129.2937111	-139.6000223	-140.4913453
Acetonitrile	41	N		22	0	-33.95994749	-12.82016761	-12.88049762	-36.58793397	-15.31134848	-15.37174436	-11.67152432	11.82550433	11.88759842
N,N-Dimethylformamide	49	N		40	0	141.0180501	137.1714473	136.9209962	130.9875311	127.595366	127.5069082	137.5054295	135.5183118	135.5512375
Propionitrile	52	N		30	0	-31.62128988	-10.65468168	-10.65925116	-34.3492728	-13.15926823	-13.19456805	-8.71209348	12.03065721	12.11792032
2-Chloropropanitrile	53	N		46	0	-42.6978029	-27.14333478	-26.91701868	-46.76447842	-31.19535901	-31.14415684	-18.97073556	-6.3219113	-6.13330948
Isoxazole	54	N		36	0	-162.7287021	-157.3132191	-160.0354055	-183.1188401	-177.6471629	-181.0619351	-146.691667	-142.8231077	-145.4549614
2-Methyl-2-nitropropane	61	N		56	0	-179.9920723	-188.5748094	-190.0908466	-197.7903821	-207.3023954	-209.132104	-149.4419743	-157.4375976	-159.0197973
N,N-Dimethylacetamide ((Me)2NCOCH3))	64	N		48	0	145.4065721	141.56254	141.4168708	135.5764637	132.1857009	132.2412741	141.7415107	139.6191479	139.7202273
2-Methyl-2-cyanopropane	67	N		38	0	-29.83951911	-9.74871865	-9.73205401	-32.5993927	-12.24927142	-12.24965178	-6.55018951	14.82001977	14.95384962
Methylthiazole	72	N		52	0	-108.9202535	-108.0008787	-110.4115966	-119.0158553	-117.9119101	-120.580264	-80.71107283	-77.47917817	-79.64568601
Pyrimidine	73	N		42	0	-73.7694756	-70.26691467	-71.81363216	-84.62046803	-80.92515429	-82.3129556	-48.75683096	-46.37209303	-47.63552563
1,4-Pyrazine	74	N		42	0	-117.6643174	-114.2208243	-115.4931011	-127.4141492	-123.8976933	-125.3254597	-84.71356408	-80.91996202	-82.00336595
1,2-Pyrazine	75	N		42	0	-217.0716446	-201.2498292	-201.7872331	-228.8662088	-213.1609917	-214.2169392	-173.4672508	-160.3361422	-160.1194208
N-Methylpyrrolidine	81	N		48	0	202.0973242	196.8759225	194.7661132	191.7749958	186.7102106	184.3475312	191.8001677	186.8812517	184.9413514
2-Methyl-2-cyanopropane	83	N		46	0	-27.7870908	-8.68142133	-8.5636238	-30.53060332	-11.18388737	-11.14562277	-4.06094375	21.02479523	21.2012025
N-Methylpyrrole	85	N		44	0	89.17533414	84.28339426	83.73094081	80.36404119	75.79502691	75.26770121	94.30319599	89.01668249	88.49381391
N-Methylpiperidine	92	N		56	0	207.8163666	203.9508808	202.0649687	196.8204949	193.1723722	191.0730828	197.1433575	193.8717331	192.0710341
Nitrobenzene	97	N		64	1	-140.25773	-142.8409161	-144.2902113	-156.1373301	-159.144963	-160.8771974	-111.8606854	-112.4059371	-113.8292402
N,N-Dimethylaniline	102	N		66	0	202.7090557	202.6711082	200.8391286	192.7023733	193.3943773	191.6415517	189.6684163	192.0517471	191.0603288
Indole	103	N		62	0	116.18764	117.3210747	117.0937553	109.6888889	111.573159	111.4033924	120.5072558	120.9359556	120.8636554
crotonaldehyde (trans-2-butenal) s-trans	1	O		38	0	-342.9400635	-277.9473044	-284.5926349	-349.5220563	-281.7325057	-289.0119252	-293.2724686	-215.5729561	-222.1604759
maleic anhydride	3	O		50	0	20.87273483	30.37101083	28.46258742	7.07763057	17.26670569	15.1727803	16.67314703	20.60639362	18.75929755
2,5-dihydrofuran	4	O		38	0	306.4967705	300.1644849	296.8871891	294.604851	288.4170054	284.5550144	284.0517184	279.7082347	276.1059982
1,3-dioxane	8	O		48	0	255.3512794	254.7001007	252.2527198	242.5744965	242.5599079	239.6445288	234.6773692	235.1922763	232.5243077
dimethylacetal	9	O		50	0	255.6707106	250.3095237	247.786936	243.4980625	238.4823464	235.4790478	236.0823946	231.2963098	228.7683781
ethylene carbonate	12	O		46	0	183.5730728	186.0396657	185.4929714	172.7998419	175.9663565	175.3361994	170.7139472	175.3627345	174.5236254
beta-butyrolactone	15	O		46	0	13.88206333	14.15176574	12.64748297	-3.17448469	-2.36383772	-4.14287975	-5.49663749	-3.47630346	-4.96335413
diketene	19	O		44	0	-46.25546629	-44.36767062	-45.12936366	-60.87785061	-58.43983234	-59.33011724	-61.56798007	-58.92075579	-59.37540698
pivalaldehyde	20	O		48	0	-320.7011179	-280.1527345	-284.4808836	-327.7224329	-285.509916	-290.5281018	-268.3306096	-224.4460687	-228.0042156
ethyl cyanoformate	23	O		52	0	99.2341398	96.83337397	99.93283402	86.62525269	84.21345793	87.63946614	85.22372357	84.65768429	88.47292389
Methanol	27	O		18	0	331.4959479	335.4918784	334.3799873	322.9674408	327.2776753	326.0751023	319.0186304	323.5275792	322.4701131
Nitromethane	28	O		32	0	-346.6477052	-328.7233873	-334.2714739	-374.6683366	-355.7832085	-361.7741717	-327.311843	-311.8188714	-317.1426129
Nitroethane	31	O		40	0	-333.3244278	-321.5920471	-326.817948	-359.7607128	-347.3228394	-353.1565738	-311.624304	-301.1860905	-305.685606
Acetaldehyde	36	O		24	0	-369.6741465	-321.2453808	-326.9995753	-374.8850228	-325.4964267	-331.7310475	-311.3996905	-271.110556	-276.3192201
Oxirane	37	O		24	0	350.4799927	350.2318178	348.5383892	340.697008	341.6574876	339.702502	334.7382227	336.3413747	334.3098704
Dimethylsulfoxide	38	O		42	0	282.2928249	286.1946057	279.8060213	261.6463852	270.4152973	263.2368694	260.2105259	265.7542269	258.9576026
Acetyl chloride	40	O		40	0	-258.9875236	-233.1590689	-235.5740889	-261.4299195	-236.1940372	-237.93596	-213.5568214	-191.455858	-193.0328899
Acetone	46	O		32	0	-353.6363278	-300.9583495	-306.2234786	-358.6431989	-305.2595122	-311.0320794	-302.3833009	-250.5333076	-255.0225342
Oxetane	47	O		32	0	322.0723203	317.1460323	315.1004006	307.5703152	302.831043	300.1766837	297.8771669	294.6459806	292.405603
Methyl acetate Z	48	O		40	0	-110.7530485	-88.61912925	-90.36994363	-117.7466999	-94.99916492	-96.93350824	-84.3387851	-63.81553088	-67.62124763
N,N-Dimethylformamide	49	O		40	0	-73.30392355	-34.01648084	-34.01967963	-83.013358	-41.32127688	-41.36007373	-51.2550858	-12.95656139	-13.94208908
1,1,1-Trichloroacetone	50	O		80	0	-298.650248	-268.3570803	-271.7400537	-300.9017865	-271.2250352	-276.8090895	-232.8283165	-205.33017	-208.7305461
Cyclopropanone	51	O		30	0	-304.5676818	-262.9740627	-268.9475421	-308.4957012	-266.2408165	-272.6937803	-253.4409303	-215.8538656	-221.7470199
Isoxazole	54	O		36	0	-85.63724578	-84.49484937	-87.12446073	-103.8491168	-102.642193	-106.3595904	-86.93858239	-86.54349465	-89.41664802
2-Methyl-2-nitropropane	61	O		56	0	-333.6854019	-322.9187935	-327.4193589	-359.9499482	-348.4290242	-353.4861927	-310.0531742	-295.0149814	-299.5783532
THF	63	O		40	0	292.6293342	286.2271834	282.4271818	279.1746024	273.2253373	268.7095173	268.2889985	263.9219531	259.5803565
N,N-Dimethylacetamide ((Me)2NCOCH3))	64	O		48	0	-91.20462722	-52.56100025	-52.64624439	-100.9334905	-60.6652577	-60.82676382	-67.898506	-26.51055064	-27.14956379
Cyclobutanone	65	O		38	0	-333.6380135	-288.8992191	-295.7220004	-336.6467127	-291.3946041	-298.4987471	-286.3699106	-246.2221428	-248.4559969
gamma-Butyrolactone (C4H6O2)	66	O		46	0	106.4759186	101.6214379	99.45210588	94.18680846	89.57172287	87.16160155	94.85660794	91.73492749	89.39988167
Furan	68	O		36	0	25.68612571	23.59810062	21.94473142	16.06776053	14.25853759	12.38617209	28.08823651	26.50207855	24.60284807
3-Butyn-2-one	69	O		36	0	-375.815503	-323.9197185	-329.9942587	-382.1716517	-328.7453863	-334.8006245	-319.3608931	-274.8637415	-280.8612543
2,3-Dichloro-2,3-dehydrobutyrolactone	71	O		76	0	118.8705784	119.9068232	119.9455399	105.3392029	106.7391825	106.8207692	103.6630487	107.0293066	107.3304938
MTBE (methyl t-butyl ether)	79	O		50	0	277.6732029	271.1266459	269.1346225	264.1537127	258.1566914	255.7092628	257.9251403	251.8750073	249.5707839
Tetrahydropyran (THP)	80	O		48	0	282.8364578	276.8767456	274.4489815	270.2331985	264.8866552	262.0915561	260.7541381	256.6828298	253.9464564
Cyclopentanone	82	O		46	0	-314.2524579	-266.0247623	-270.9494168	-320.3161949	-271.0632174	-276.2869128	-265.1745301	-213.6905823	-218.1761192
Cyclopentenone	84	O		44	0	-277.5185917	-218.1603616	-224.1460774	-283.8069204	-222.3210208	-228.6728363	-234.7848869	-170.8207532	-176.7459531
Furfural	86	O		50	0	20.61917028	25.76207071	24.20800809	10.43633596	16.31143517	14.55750093	22.76737412	26.74344476	25.28283773
Cyclohexanone	93	O		54	0	-331.2203166	-278.3326407	-283.965448	-335.7986374	-281.9435734	-287.8270337	-278.1908114	-224.6157237	-229.6714099
Cyclohexenone	94	O		52	0	-327.876862	-265.5492819	-272.6002023	-333.6095496	-269.4293432	-277.0786236	-282.7483232	-209.1053177	-215.7959347
Nitrobenzene	97	O		64	0	-289.9319855	-274.9840976	-281.0700205	-316.55646	-299.5412991	-306.5775722	-270.4594867	-243.4147266	-249.5374053
1,4-Benzoquinone	98	O		56	0	-431.8316424	-381.0145329	-389.4778337	-437.2362148	-384.1076252	-393.2682389	-397.1802141	-314.773775	-322.2040877
Anisole (methoxybenzene)	101	O		58	0	232.2787832	229.7188373	228.2621666	222.9327083	220.8356109	219.1981435	215.2120114	213.7649745	211.9814077
methyl isothiocyanate	0	S		38	0	771.9119088	772.6156749	768.0669033	740.3837928	744.2766945	754.0422631	723.0000313	726.5380799	747.5131811
2-methylthiophene	10	S		52	0	261.4979407	253.0144816	250.6961975	225.6644443	218.5104587	215.9184299	295.7790626	289.2089045	286.7647071
ethyl sulfide	13	S		50	0	507.5344756	498.8783106	497.1852726	457.8120044	451.4710117	449.5875201	506.5002657	503.0269862	503.7289955
allyl isothiocyanate	17	S		52	0	743.0451565	745.1759791	765.2309687	723.2633932	726.4520082	749.526081	711.440099	708.8613807	718.2527863
Dimethylsulfoxide	38	S		42	0	193.2751417	200.9740322	201.1479114	147.1220301	157.0737231	157.2584688	212.8583046	221.5064017	221.7866803
Thiirane	39	S		32	0	774.3660907	783.6772239	784.5804863	740.2245029	754.7661102	755.2020736	767.3050138	780.0069612	780.0605125
Thiophene	70	S		44	0	267.1754236	262.2797715	259.7844209	232.379857	228.6059793	226.0021851	301.3391953	301.0739226	300.9024269
Methylthiazole	72	S		52	0	226.1239388	231.2671148	230.514262	188.1175059	194.6180335	194.3367903	262.6961329	265.8021936	264.9154119
Chlorodimethylsilane ((CH3)2SiHCl)	32	SI		50	0	325.6831518	325.2273677	322.3684151	306.7515668	306.6764195	303.3137922	347.3176939	347.9941929	345.2715672
TMS	104	SI		49	0	340.5426164	344.3404261	344.0186578	321.9719304	326.887677	326.5145676	359.798378	363.9599992	363.7242287
